# Supplementary material
Source: PubMed Central journal article supplement (PMC9649424)
Supplement: ciac536_supplementary_data.pdf [file ciac536_supplementary_data.pdf]

**Supplement to Systematic Review of Hospital Treatment Outcomes for Naturally Acquired and Bioterrorism-Related Anthrax, 1880-2018**

By Person MK et al.

Published in *Clinical Infectious Diseases*

## Table of Contents

|                                |                                                                                                                                                                                                                                         |    |
|--------------------------------|-----------------------------------------------------------------------------------------------------------------------------------------------------------------------------------------------------------------------------------------|----|
| <b>Supplementary Table 1.</b>  | Line List of Patients Hospitalized for Anthrax, 1880-2018.....                                                                                                                                                                          | 3  |
| <b>Supplementary Table 2a.</b> | Survival for Adults Reported to Be Hospitalized for Anthrax by Meningitis Status, Route of Infection, Systemic Criteria, and Treatment During First Two Days of Hospitalization, <sup>a</sup> 1880 .....                                | 25 |
| <b>Supplementary Table 2b.</b> | Survival for Children and Adolescents Reported to Be Hospitalized for Anthrax by Meningitis Status, Route of Infection, Systemic Criteria, and Treatment During First Two Days of Hospitalization, <sup>a</sup> 1940–2018 .....         | 26 |
| <b>Supplementary Table 3a.</b> | Survival for Adults Reported to Be Hospitalized for Anthrax by Meningitis Status, Route of Infection, Systemic Criteria, and Antimicrobial Treatment During First Two Days of Hospitalization, <sup>a</sup> 1880–2018 .....             | 27 |
| <b>Supplementary Table 3b.</b> | Survival for Adults Reported to Be Hospitalized for Anthrax by Meningitis Status, Route of Infection, Systemic Criteria, and Penicillin Treatment During First Two Days of Hospitalization, <sup>a</sup> 1940–2018 .....                | 29 |
| <b>Supplementary Table 4.</b>  | Survival for Children and Adolescents Reported to Be Hospitalized for Systemic Anthrax by Specified Treatment During First Two Days of Hospitalization, 1940–2018 <sup>a</sup> .....                                                    | 30 |
| <b>Supplementary Table 5.</b>  | Survival for Children and Adolescents Reported to Be Hospitalized for Anthrax by Antitoxin/Antiserum Receipt Throughout Hospitalization, 1900–2018 <sup>a</sup> .....                                                                   | 31 |
| <b>Supplementary Table 6.</b>  | Survival for Children and Adolescents Reported to Be Hospitalized for All Types of Anthrax with Various Complications by Steroid Use, 1950–2018 <sup>a</sup> 31                                                                         |    |
| <b>Supplementary Table 7.</b>  | Survival for Children and Adolescents Reported to Be Hospitalized for Systemic Anthrax Meningitis by Specified Treatment <sup>a</sup> .....                                                                                             | 32 |
| <b>Supplementary Table 8.</b>  | Hospital Length of Stay for Pediatric Survivors Reported to Be Hospitalized for Anthrax by Meningitis Status, Route of Infection, Systemic Criteria and Treatment During First Two Days of Hospitalization, <sup>a</sup> 1940–2018..... | 33 |
| <b>Supplementary Table 9.</b>  | Postexposure Prophylaxis in People Exposed to “Anthrax-Affected Animals” in Russia Before 1965 <sup>a</sup> .....                                                                                                                       | 34 |
| <b>Supplementary Table 10.</b> | Postexposure Prophylaxis In People Who Ingested Meat From “Anthrax-Affected Animals” In Russia, 1965–1967 <sup>a</sup> .....                                                                                                            | 34 |

**Supplementary Table 1. Line List of Patients Hospitalized for Anthrax, 1880-2018**

| Case No.   | Year of Publication |      |     |     |     |     | Age   | Sex | Route | Systemic <sup>a</sup> | Meningitis | Pretreated <sup>b</sup> | No Treatment <sup>c</sup> | No. of classes <sup>d</sup> | Drug Class <sup>d</sup> | Antitoxin/             |          |          |             | Died <sup>e</sup> | LOS <sup>e</sup> |     |
|------------|---------------------|------|-----|-----|-----|-----|-------|-----|-------|-----------------------|------------|-------------------------|---------------------------|-----------------------------|-------------------------|------------------------|----------|----------|-------------|-------------------|------------------|-----|
|            | 1                   | 2    | 3   | 4   | 5   | 6   |       |     |       |                       |            |                         |                           |                             |                         | Antiserum <sup>e</sup> | Steroids | Mannitol | Intrathecal |                   |                  |     |
| 1 [1]      | 1880                | ...  | ... | ... | ... | ... | 23    | M   | inhal | Yes <sup>a</sup>      | No         | No                      | Yes                       | ...                         | ...                     | ...                    | No       | No       | No          | 2                 | ...              |     |
| 2 [1]      | 1880                | ...  | ... | ... | ... | ... | 27    | M   | inhal | Yes                   | Yes        | No                      | Yes                       | ...                         | ...                     | ...                    | No       | No       | No          | 2                 | ...              |     |
| 3 [1]      | 1880                | ...  | ... | ... | ... | ... | 37    | M   | inhal | Yes                   | No         | No                      | Yes                       | ...                         | ...                     | ...                    | No       | No       | No          | 3                 | ...              |     |
| 4 [1]      | 1880                | ...  | ... | ... | ... | ... | 58    | M   | inhal | Yes                   | No         | No                      | Yes                       | ...                         | ...                     | ...                    | No       | No       | No          | 2                 | ...              |     |
| 5 [1]      | 1880                | ...  | ... | ... | ... | ... | adult | M   | inhal | Yes <sup>a</sup>      | No         | No                      | Yes                       | ...                         | ...                     | ...                    | No       | No       | No          | 5                 | ...              |     |
| 6 [2]      | 1881                | ...  | ... | ... | ... | ... | 15    | M   | cut   | Yes                   | No         | No                      | Yes                       | ...                         | ...                     | ...                    | No       | No       | No          | N                 | ...              |     |
| 7 [2]      | 1881                | ...  | ... | ... | ... | ... | 63    | M   | cut   | Yes                   | No         | No                      | Yes                       | ...                         | ...                     | ...                    | No       | No       | No          | 4                 | ...              |     |
| 8 [3]      | 1883                | ...  | ... | ... | ... | ... | 43    | M   | cut   | Yes                   | No         | No                      | Yes                       | ...                         | ...                     | ...                    | No       | No       | No          | N                 | 30               |     |
| 9 [4]      | 1893                | ...  | ... | ... | ... | ... | 48    | M   | cut   | Yes                   | Yes        | No                      | Yes                       | ...                         | ...                     | ...                    | No       | No       | No          | 3                 | 3                |     |
| 10 [5]     | 1901                | ...  | ... | ... | ... | ... | 16    | F   | inhal | Yes                   | Yes        | No                      | Yes                       | ...                         | ...                     | ...                    | No       | No       | No          | Y                 | ...              |     |
| 11 [6]     | 1901                | ...  | ... | ... | ... | ... | 20    | M   | cut   | Yes                   | No         | No                      | Yes                       | ...                         | ...                     | ...                    | No       | No       | No          | N                 | 22               |     |
| 12 [7]     | 1901                | ...  | ... | ... | ... | ... | 27    | M   | cut   | Yes                   | No         | No                      | Yes                       | ...                         | ...                     | ...                    | No       | No       | No          | 3                 | ...              |     |
| 13 [7]     | 1901                | ...  | ... | ... | ... | ... | 29    | M   | cut   | Yes                   | No         | No                      | Yes                       | ...                         | ...                     | ...                    | No       | No       | No          | N                 | ...              |     |
| 14 [7]     | 1901                | ...  | ... | ... | ... | ... | 30    | M   | cut   | ...                   | No         | No                      | Yes                       | ...                         | ...                     | ...                    | No       | No       | No          | N                 | ...              |     |
| 15 [8]     | 1901                | ...  | ... | ... | ... | ... | 33    | M   | inhal | Yes                   | Yes        | No                      | Yes                       | ...                         | ...                     | ...                    | No       | No       | No          | 4                 | ...              |     |
| 16 [7]     | 1901                | ...  | ... | ... | ... | ... | 35    | M   | cut   | Yes                   | No         | No                      | Yes                       | ...                         | ...                     | ...                    | No       | No       | No          | 3                 | ...              |     |
| 17 [7]     | 1901                | ...  | ... | ... | ... | ... | 48    | M   | cut   | ...                   | No         | No                      | Yes                       | ...                         | ...                     | ...                    | No       | No       | No          | N                 | ...              |     |
| 18 [9]     | 1901                | ...  | ... | ... | ... | ... | NR    | M   | inhal | ...                   | Yes        | No                      | Yes                       | ...                         | ...                     | ...                    | No       | No       | No          | Y                 | ...              |     |
| 19 [10]    | 1902                | ...  | ... | ... | ... | ... | 42    | M   | inhal | Yes                   | Yes        | No                      | Yes                       | ...                         | ...                     | ...                    | No       | No       | No          | Y                 | ...              |     |
| 20 [11]    | 1904                | ...  | ... | ... | ... | ... | 27    | M   | cut   | Yes                   | No         | No                      | No                        | ...                         | ...                     | ...                    | 1        | No       | No          | No                | N                | ... |
| 21 [11]    | 1904                | ...  | ... | ... | ... | ... | 30    | M   | cut   | Yes                   | No         | No                      | No                        | ...                         | ...                     | ...                    | 4        | No       | No          | No                | N                | ... |
| 22 [12]    | 1905                | ...  | ... | ... | ... | ... | 30    | F   | cut   | Yes                   | No         | No                      | No                        | ...                         | ...                     | ...                    | Y        | No       | No          | No                | N                | ... |
| 23 [13]    | 1905                | ...  | ... | ... | ... | ... | 31    | M   | cut   | Yes                   | No         | No                      | No                        | ...                         | ...                     | ...                    | 1        | No       | No          | No                | N                | 22  |
| 24 [14]    | 1905                | ...  | ... | ... | ... | ... | 35    | F   | cut   | ...                   | No         | No                      | No                        | ...                         | ...                     | ...                    | 1        | No       | No          | No                | N                | 8   |
| 25 [15,16] | 1905                | 1906 | ... | ... | ... | ... | 36    | M   | inhal | Yes                   | Yes        | No                      | Yes                       | ...                         | ...                     | ...                    | No       | No       | No          | 2                 | 0.7              |     |
| 26 [12]    | 1905                | ...  | ... | ... | ... | ... | 60    | M   | cut   | Yes                   | Yes        | No                      | No                        | ...                         | ...                     | ...                    | 3        | No       | No          | No                | 6                | ... |
| 27 [17]    | 1906                | ...  | ... | ... | ... | ... | adult | M   | cut   | Yes <sup>a</sup>      | No         | No                      | Yes                       | ...                         | ...                     | ...                    | No       | No       | No          | 3                 | 3                |     |
| 28 [18]    | 1908                | ...  | ... | ... | ... | ... | 19    | F   | cut   | Yes                   | Yes        | No                      | Yes                       | ...                         | ...                     | ...                    | No       | No       | No          | 2                 | 2                |     |
| 29 [19]    | 1908                | ...  | ... | ... | ... | ... | 30    | M   | NP    | Yes                   | No         | No                      | Yes                       | ...                         | ...                     | ...                    | No       | No       | No          | N                 | ...              |     |
| 30 [20]    | 1909                | ...  | ... | ... | ... | ... | 13    | M   | cut   | Yes                   | No         | No                      | No                        | ...                         | ...                     | ...                    | 1        | No       | No          | No                | N                | 11  |
| 31 [20]    | 1909                | ...  | ... | ... | ... | ... | 18    | M   | cut   | Yes                   | No         | No                      | No                        | ...                         | ...                     | ...                    | 2        | No       | No          | No                | 6                | 6   |
| 32 [20]    | 1909                | ...  | ... | ... | ... | ... | 23    | M   | cut   | Yes                   | No         | No                      | No                        | ...                         | ...                     | ...                    | 1        | No       | No          | No                | N                | 94  |
| 33 [21]    | 1909                | ...  | ... | ... | ... | ... | 29    | F   | inhal | Yes <sup>a</sup>      | No         | No                      | Yes                       | ...                         | ...                     | ...                    | No       | No       | No          | Y                 | ...              |     |
| 34 [20]    | 1909                | ...  | ... | ... | ... | ... | 32    | F   | cut   | Yes                   | No         | No                      | No                        | ...                         | ...                     | ...                    | 1        | No       | No          | No                | N                | 13  |
| 35 [21]    | 1909                | ...  | ... | ... | ... | ... | 42    | M   | inhal | Yes <sup>a</sup>      | No         | No                      | Yes                       | ...                         | ...                     | ...                    | No       | No       | No          | Y                 | ...              |     |
| 36 [20]    | 1909                | ...  | ... | ... | ... | ... | 44    | M   | cut   | Yes                   | No         | No                      | No                        | ...                         | ...                     | ...                    | 1        | No       | No          | No                | N                | 28  |
| 37 [20]    | 1909                | ...  | ... | ... | ... | ... | 52    | M   | cut   | Yes                   | No         | No                      | No                        | ...                         | ...                     | ...                    | 2        | No       | No          | No                | N                | 11  |
| 38 [20]    | 1909                | ...  | ... | ... | ... | ... | 55    | M   | cut   | ...                   | No         | No                      | No                        | ...                         | ...                     | ...                    | 1        | No       | No          | No                | N                | 15  |
| 39 [21]    | 1909                | ...  | ... | ... | ... | ... | 56    | F   | inhal | Yes <sup>a</sup>      | No         | No                      | Yes                       | ...                         | ...                     | ...                    | No       | No       | No          | Y                 | ...              |     |
| 40 [21]    | 1909                | ...  | ... | ... | ... | ... | NR    | M   | inhal | ...                   | No         | No                      | Yes                       | ...                         | ...                     | ...                    | No       | No       | No          | Y                 | ...              |     |
| 41 [21]    | 1909                | ...  | ... | ... | ... | ... | NR    | F   | inhal | ...                   | No         | No                      | Yes                       | ...                         | ...                     | ...                    | No       | No       | No          | Y                 | ...              |     |

|            |           |     |     |     |     |       |   |       |                  |     |    |     |     |     |     |    |    |    |   |      |
|------------|-----------|-----|-----|-----|-----|-------|---|-------|------------------|-----|----|-----|-----|-----|-----|----|----|----|---|------|
| 42 [22]    | 1910      | ... | ... | ... | ... | NR    | M | inhal | ...              | No  | No | Yes | ... | ... | ... | No | No | No | Y | ...  |
| 43 [23]    | 1911      | ... | ... | ... | ... | 53    | M | inhal | Yes              | No  | No | No  | ... | ... | 1   | No | No | No | N | ...  |
| 44 [24]    | 1913      | ... | ... | ... | ... | 19    | M | ...   | Yes              | Yes | No | Yes | ... | ... | ... | No | No | No | 8 | 8    |
| 45 [24]    | 1913      | ... | ... | ... | ... | 21    | M | ...   | Yes              | Yes | No | Yes | ... | ... | ... | No | No | No | 9 | 8    |
| 46 [25]    | 1917      | ... | ... | ... | ... | 16    | M | cut   | Yes              | Yes | No | Yes | ... | ... | ... | No | No | No | 3 | 3    |
| 47 [26]    | 1917      | ... | ... | ... | ... | 24    | M | cut   | ...              | No  | No | Yes | ... | ... | ... | No | No | No | N | ...  |
| 48 [27]    | 1917      | ... | ... | ... | ... | 26    | M | inhal | Yes              | No  | No | Yes | ... | ... | ... | No | No | No | N | .    |
| 49 [25]    | 1917      | ... | ... | ... | ... | 29    | M | ...   | Yes              | Yes | No | Yes | ... | ... | ... | No | No | No | 9 | 9    |
| 50 [26,28] | 1917 1920 | ... | ... | ... | ... | 31    | M | cut   | Yes              | No  | No | Yes | ... | ... | ... | No | No | No | 8 | 8    |
| 51 [26]    | 1917      | ... | ... | ... | ... | 33    | M | cut   | Yes <sup>a</sup> | No  | No | Yes | ... | ... | ... | No | No | No | Y | ...  |
| 52 [25]    | 1917      | ... | ... | ... | ... | 50    | M | cut   | Yes              | Yes | No | Yes | ... | ... | ... | No | No | No | 2 | 1    |
| 53 [26]    | 1917      | ... | ... | ... | ... | 50    | M | cut   | ...              | No  | No | Yes | ... | ... | ... | No | No | No | N | ...  |
| 54 [26]    | 1917      | ... | ... | ... | ... | 52    | M | cut   | Yes              | No  | No | Yes | ... | ... | ... | No | No | No | Y | ...  |
| 55 [29]    | 1917      | ... | ... | ... | ... | 54    | M | cut   | Yes              | No  | No | No  | ... | ... | 1   | No | No | No | N | 15   |
| 56 [26,28] | 1917 1920 | ... | ... | ... | ... | 64    | M | cut   | Yes              | No  | No | Yes | ... | ... | ... | No | No | No | 4 | 4    |
| 57 [30]    | 1917      | ... | ... | ... | ... | adult | M | inhal | Yes              | No  | No | Yes | ... | ... | ... | No | No | No | 7 | 6.2  |
| 58 [31]    | 1918      | ... | ... | ... | ... | 36    | M | cut   | Yes              | No  | No | No  | ... | ... | 1   | No | No | No | N | ...  |
| 59 [32]    | 1918      | ... | ... | ... | ... | 54    | M | cut   | Yes              | No  | No | No  | ... | ... | Y   | No | No | No | N | ...  |
| 60 [32]    | 1918      | ... | ... | ... | ... | 64    | M | cut   | ...              | No  | No | No  | ... | ... | 2   | No | No | No | N | ...  |
| 61 [33]    | 1918      | ... | ... | ... | ... | adult | M | cut   | Yes              | Yes | No | Yes | ... | ... | ... | No | No | No | 2 | 0.75 |
| 62 [33]    | 1918      | ... | ... | ... | ... | adult | M | cut   | Yes              | Yes | No | No  | ... | ... | 1   | No | No | No | 2 | 0.75 |
| 63 [34]    | 1919      | ... | ... | ... | ... | 19    | M | cut   | Yes              | No  | No | No  | ... | ... | 2   | No | No | No | N | 21   |
| 64 [35]    | 1919      | ... | ... | ... | ... | 21    | M | cut   | Yes              | No  | No | No  | ... | ... | 1   | No | No | No | N | 26   |
| 65 [35]    | 1919      | ... | ... | ... | ... | 29    | M | cut   | Yes              | No  | No | No  | ... | ... | 1   | No | No | No | 5 | 5    |
| 66 [35]    | 1919      | ... | ... | ... | ... | 30    | M | cut   | Yes              | No  | No | No  | ... | ... | 1   | No | No | No | N | ...  |
| 67 [36]    | 1919      | ... | ... | ... | ... | adult | M | cut   | ...              | No  | No | Yes | ... | ... | ... | No | No | No | N | ...  |
| 68 [36]    | 1919      | ... | ... | ... | ... | adult | M | cut   | Yes              | No  | No | No  | ... | ... | 67  | No | No | No | N | ...  |
| 69 [36]    | 1919      | ... | ... | ... | ... | adult | M | cut   | Yes              | No  | No | Yes | ... | ... | ... | No | No | No | N | ...  |
| 70 [37,38] | 1920 1923 | ... | ... | ... | ... | 14    | M | cut   | Yes              | No  | No | No  | ... | ... | 1   | No | No | No | N | ...  |
| 71 [37]    | 1920      | ... | ... | ... | ... | 15    | M | cut   | ...              | No  | No | Yes | ... | ... | ... | No | No | No | N | ...  |
| 72 [37,38] | 1920 1923 | ... | ... | ... | ... | 16    | M | cut   | Yes              | No  | No | No  | ... | ... | 1   | No | No | No | N | ...  |
| 73 [37]    | 1920      | ... | ... | ... | ... | 16    | F | cut   | ...              | No  | No | Yes | ... | ... | ... | No | No | No | N | ...  |
| 74 [37]    | 1920      | ... | ... | ... | ... | 18    | M | cut   | ...              | No  | No | No  | ... | ... | 1   | No | No | No | N | ...  |
| 75 [37]    | 1920      | ... | ... | ... | ... | 18    | M | cut   | Yes              | No  | No | No  | ... | ... | 1   | No | No | No | N | 7    |
| 76 [37]    | 1920      | ... | ... | ... | ... | 20    | M | cut   | Yes              | No  | No | No  | ... | ... | Y   | No | No | No | 3 | ...  |
| 77 [37,38] | 1920 1923 | ... | ... | ... | ... | 21    | F | cut   | ...              | No  | No | No  | ... | ... | 1   | No | No | No | N | ...  |
| 78 [37]    | 1920      | ... | ... | ... | ... | 24    | M | cut   | ...              | No  | No | No  | ... | ... | Y   | No | No | No | N | ...  |
| 79 [37]    | 1920      | ... | ... | ... | ... | 25    | M | cut   | Yes              | No  | No | No  | ... | ... | 1   | No | No | No | N | 7    |
| 80 [37]    | 1920      | ... | ... | ... | ... | 29    | M | cut   | Yes              | No  | No | No  | ... | ... | 1   | No | No | No | N | ...  |
| 81 [37]    | 1920      | ... | ... | ... | ... | 31    | M | cut   | Yes              | No  | No | No  | ... | ... | 1   | No | No | No | N | ...  |
| 82 [37]    | 1920      | ... | ... | ... | ... | 32    | M | cut   | ...              | No  | No | No  | ... | ... | Y   | No | No | No | N | ...  |
| 83 [37,38] | 1920 1923 | ... | ... | ... | ... | 32    |   | cut   | Yes              | No  | No | No  | ... | ... | 1   | No | No | No | N | ...  |
| 84 [37]    | 1920      | ... | ... | ... | ... | 34    | M | cut   | Yes              | No  | No | No  | ... | ... | Y   | No | No | No | 4 | 4    |
| 85 [39]    | 1920      | ... | ... | ... | ... | 34    | M | cut   | Yes              | No  | No | Yes | ... | ... | ... | No | No | No | N | 7    |
| 86 [40]    | 1920      | ... | ... | ... | ... | 36    | M | cut   | Yes              | No  | No | No  | ... | ... | 1   | No | No | No | N | 6    |
| 87 [41]    | 1920      | ... | ... | ... | ... | 36    | M | inhal | Yes              | No  | No | No  | ... | ... | 2   | No | No | No | 4 | 4    |

|            |      |      |     |     |     |     |    |         |                  |     |    |     |     |     |     |    |    |    |    |     |
|------------|------|------|-----|-----|-----|-----|----|---------|------------------|-----|----|-----|-----|-----|-----|----|----|----|----|-----|
| 88 [37,38] | 1920 | 1923 | ... | ... | ... | ... | 36 | cut     | ...              | No  | No | No  | ... | ... | 1   | No | No | No | N  | ... |
| 89 [37]    | 1920 | ...  | ... | ... | ... | ... | 37 | M cut   | Yes              | No  | No | No  | ... | ... | 1   | No | No | No | N  | ... |
| 90 [37]    | 1920 | ...  | ... | ... | ... | ... | 43 | M cut   | Yes <sup>a</sup> | No  | No | Yes | ... | ... | ... | No | No | No | 3  | 3   |
| 91 [37]    | 1920 | ...  | ... | ... | ... | ... | 44 | M cut   | Yes              | No  | No | No  | ... | ... | Y   | No | No | No | N  | ... |
| 92 [37]    | 1920 | ...  | ... | ... | ... | ... | 45 | M cut   | Yes              | No  | No | No  | ... | ... | Y   | No | No | No | N  | ... |
| 93 [37]    | 1920 | ...  | ... | ... | ... | ... | 46 | M cut   | ...              | No  | No | No  | ... | ... | Y   | No | No | No | N  | ... |
| 94 [37]    | 1920 | ...  | ... | ... | ... | ... | 47 | M cut   | Yes              | No  | No | No  | ... | ... | 1   | No | No | No | N  | 14  |
| 95 [37]    | 1920 | ...  | ... | ... | ... | ... | 48 | M cut   | Yes              | No  | No | No  | ... | ... | 1   | No | No | No | 2  | 2   |
| 96 [37]    | 1920 | ...  | ... | ... | ... | ... | 48 | M cut   | Yes              | No  | No | No  | ... | ... | 1   | No | No | No | N  | ... |
| 97 [37]    | 1920 | ...  | ... | ... | ... | ... | 57 | M cut   | Yes <sup>a</sup> | No  | No | No  | ... | ... | 2   | No | No | No | 3  | ... |
| 98 [37]    | 1920 | ...  | ... | ... | ... | ... | 59 | M cut   | Yes <sup>a</sup> | No  | No | No  | ... | ... | 3   | No | No | No | 4  | 4   |
| 99 [37]    | 1920 | ...  | ... | ... | ... | ... | 63 | M cut   | Yes              | No  | No | Yes | ... | ... | ... | No | No | No | N  | ... |
| 100 [37]   | 1920 | ...  | ... | ... | ... | ... | 79 | M cut   | Yes <sup>a</sup> | No  | No | Yes | ... | ... | ... | No | No | No | 4  | ... |
| 101 [42]   | 1921 | ...  | ... | ... | ... | ... | NR | ...     | ...              | Yes | No | Yes | ... | ... | ... | No | No | No | 3  | 3   |
| 102 [43]   | 1922 | ...  | ... | ... | ... | ... | 35 | M cut   | Yes              | No  | No | No  | ... | ... | 1   | No | No | No | N  | 9   |
| 103 [44]   | 1923 | ...  | ... | ... | ... | ... | 16 | F cut   | ...              | No  | No | Yes | ... | ... | .   | No | No | No | N  | ... |
| 104 [38]   | 1923 | ...  | ... | ... | ... | ... | 19 | cut     | ...              | No  | No | No  | ... | ... | 1   | No | No | No | N  | ... |
| 105 [38]   | 1923 | ...  | ... | ... | ... | ... | 23 | cut     | ...              | No  | No | No  | ... | ... | 1   | No | No | No | N  | ... |
| 106 [38]   | 1923 | ...  | ... | ... | ... | ... | 28 | cut     | Yes              | No  | No | No  | ... | ... | 1   | No | No | No | N  | 6   |
| 107 [38]   | 1923 | ...  | ... | ... | ... | ... | 30 | cut     | Yes              | No  | No | No  | ... | ... | 1   | No | No | No | 4  | 4   |
| 108 [38]   | 1923 | ...  | ... | ... | ... | ... | 32 | cut     | ...              | No  | No | No  | ... | ... | 1   | No | No | No | N  | 6   |
| 109 [44]   | 1923 | ...  | ... | ... | ... | ... | 35 | M cut   | Yes              | No  | No | No  | ... | ... | 1   | No | No | No | N  | 14  |
| 110 [44]   | 1923 | ...  | ... | ... | ... | ... | 35 | F cut   | ...              | No  | No | Yes | ... | ... | ... | No | No | No | N  | ... |
| 111 [38]   | 1923 | ...  | ... | ... | ... | ... | 35 | cut     | ...              | No  | No | No  | ... | ... | 1   | No | No | No | N  | ... |
| 112 [38]   | 1923 | ...  | ... | ... | ... | ... | 37 | cut     | ...              | No  | No | No  | ... | ... | 1   | No | No | No | N  | ... |
| 113 [38]   | 1923 | ...  | ... | ... | ... | ... | 38 | cut     | ...              | No  | No | No  | ... | ... | 1   | No | No | No | N  | 3   |
| 114 [38]   | 1923 | ...  | ... | ... | ... | ... | 38 | cut     | ...              | No  | No | No  | ... | ... | 1   | No | No | No | N  | ... |
| 115 [38]   | 1923 | ...  | ... | ... | ... | ... | 39 | cut     | ...              | No  | No | No  | ... | ... | 1   | No | No | No | N  | ... |
| 116 [38]   | 1923 | ...  | ... | ... | ... | ... | 39 | cut     | ...              | No  | No | No  | ... | ... | 1   | No | No | No | N  | ... |
| 117 [38]   | 1923 | ...  | ... | ... | ... | ... | 39 | cut     | ...              | No  | No | No  | ... | ... | 1   | No | No | No | N  | ... |
| 118 [44]   | 1923 | ...  | ... | ... | ... | ... | 40 | M cut   | ...              | No  | No | Yes | ... | ... | ... | No | No | No | N  | ... |
| 119 [38]   | 1923 | ...  | ... | ... | ... | ... | 41 | cut     | Yes              | No  | No | No  | ... | ... | 1   | No | No | No | 2  | 1.5 |
| 120 [38]   | 1923 | ...  | ... | ... | ... | ... | 47 | cut     | ...              | No  | No | No  | ... | ... | 1   | No | No | No | N  | ... |
| 121 [38]   | 1923 | ...  | ... | ... | ... | ... | 49 | cut     | Yes              | No  | No | No  | ... | ... | 1   | No | No | No | N  | ... |
| 122 [44]   | 1923 | ...  | ... | ... | ... | ... | 52 | M cut   | ...              | No  | No | Yes | ... | ... | ... | No | No | No | N  | ... |
| 123 [38]   | 1923 | ...  | ... | ... | ... | ... | 52 | cut     | Yes              | No  | No | Yes | ... | ... | ... | No | No | No | 2  | 1.5 |
| 124 [38]   | 1923 | ...  | ... | ... | ... | ... | 54 | cut     | ...              | No  | No | No  | ... | ... | 1   | No | No | No | N  | ... |
| 125 [38]   | 1923 | ...  | ... | ... | ... | ... | 57 | cut     | ...              | No  | No | No  | ... | ... | 1   | No | No | No | N  | ... |
| 126 [44]   | 1923 | ...  | ... | ... | ... | ... | 60 | M cut   | ...              | No  | No | Yes | ... | ... | ... | No | No | No | N  | 16  |
| 127 [38]   | 1923 | ...  | ... | ... | ... | ... | 72 | cut     | Yes              | No  | No | No  | ... | ... | 1   | No | No | No | 5  | 5   |
| 128 [45]   | 1924 | ...  | ... | ... | ... | ... | 45 | F inhal | Yes              | No  | No | Yes | ... | ... | ... | No | No | No | 57 | 57  |
| 129 [46]   | 1926 | ...  | ... | ... | ... | ... | 35 | M cut   | Yes              | Yes | No | Yes | ... | ... | ... | No | No | No | 2  | 1.5 |
| 130 [47]   | 1928 | ...  | ... | ... | ... | ... | 27 | M cut   | ...              | No  | No | Yes | ... | ... | ... | No | No | No | N  | 12  |
| 131 [48]   | 1928 | ...  | ... | ... | ... | ... | 28 | M inhal | Yes              | No  | No | Yes | ... | ... | ... | No | No | No | 2  | 0.2 |
| 132 [49]   | 1928 | ...  | ... | ... | ... | ... | 46 | M cut   | Yes              | Yes | No | No  | ... | ... | 1   | No | No | No | 4  | 4   |
| 133 [50]   | 1928 | ...  | ... | ... | ... | ... | 50 | M cut   | Yes <sup>a</sup> | No  | No | Yes | ... | ... | ... | No | No | No | Y  | 2   |

|             |      |      |     |     |     |       |   |        |     |     |    |     |     |              |     |    |    |     |     |      |
|-------------|------|------|-----|-----|-----|-------|---|--------|-----|-----|----|-----|-----|--------------|-----|----|----|-----|-----|------|
| 134 [47]    | 1928 | ...  | ... | ... | ... | 55    | F | cut    | Yes | No  | No | No  | ... | ...          | Y   | No | No | No  | N   | ...  |
| 135 [51]    | 1929 | ...  | ... | ... | ... | 1.25  |   | cut    | Yes | No  | No | No  | ... | ...          | 1   | No | No | No  | N   | ...  |
| 136 [52]    | 1929 | ...  | ... | ... | ... | 2     | F | inhal  | Yes | No  | No | No  | ... | ...          | 5   | No | No | No  | N   | 12.5 |
| 137 [53]    | 1931 | ...  | ... | ... | ... | 17    | M | inhal  | Yes | No  | No | No  | ... | ...          | Y   | No | No | No  | N   | ...  |
| 138 [54]    | 1932 | ...  | ... | ... | ... | 17    | M | cut    | ... | No  | No | Yes | ... | ...          | ... | No | No | No  | N   | 13   |
| 139 [55]    | 1932 | ...  | ... | ... | ... | 24    | M | ...    | Yes | Yes | No | Yes | ... | ...          | ... | No | No | No  | Y   | ...  |
| 140 [56]    | 1932 | ...  | ... | ... | ... | 63    | M | cut    | Yes | No  | No | No  | ... | ...          | 1   | No | No | No  | N   | 43   |
| 141 [57]    | 1932 | ...  | ... | ... | ... | adult | M | cut    | Yes | Yes | No | No  | ... | ...          | 7   | No | No | No  | 7   | 7    |
| 142 [58]    | 1935 | ...  | ... | ... | ... | 5     | M | cut    | Yes | No  | No | Yes | ... | ...          | ... | No | No | No  | 5   | 5    |
| 143 [58]    | 1935 | ...  | ... | ... | ... | 15    | M | cut    | Yes | No  | No | Yes | ... | ...          | ... | No | No | No  | N   | 9    |
| 144 [58]    | 1935 | ...  | ... | ... | ... | 16    | F | cut    | ... | No  | No | Yes | ... | ...          | ... | No | No | No  | N   | 21   |
| 145 [58]    | 1935 | ...  | ... | ... | ... | 17    | M | cut    | Yes | No  | No | Yes | ... | ...          | ... | No | No | No  | N   | 28   |
| 146 [58]    | 1935 | ...  | ... | ... | ... | 18    | M | cut    | Yes | No  | No | Yes | ... | ...          | ... | No | No | No  | N   | 28   |
| 147 [59]    | 1935 | ...  | ... | ... | ... | 37    | M | cut    | Yes | No  | No | No  | ... | ...          | 1   | No | No | No  | N   | ...  |
| 148 [58]    | 1935 | ...  | ... | ... | ... | 50    | F | cut    | Yes | No  | No | Yes | ... | ...          | ... | No | No | No  | N   | 26   |
| 149 [60]    | 1939 | ...  | ... | ... | ... | 32    | F | cut    | Yes | Yes | No | Yes | ... | ...          | ... | No | No | No  | 2   | 1.5  |
| 150 [61]    | 1940 | ...  | ... | ... | ... | 17    | M | cut    | ... | No  | No | No  | ... | ...          | 1   | No | No | No  | N   | ...  |
| 151 [61]    | 1940 | ...  | ... | ... | ... | adult | M | cut    | Yes | No  | No | No  | ... | ...          | 1   | No | No | No  | N   | ...  |
| 152 [62]    | 1941 | ...  | ... | ... | ... | 53    | M | cut    | Yes | No  | No | No  | ... | ...          | 2   | No | No | No  | N   | 13.5 |
| 153 [63]    | 1942 | ...  | ... | ... | ... | 23    | F | cut    | ... | No  | No | Yes | ... | ...          | ... | No | No | No  | N   | 6    |
| 154 [63]    | 1942 | ...  | ... | ... | ... | 25    | F | cut    | ... | No  | No | Yes | ... | ...          | ... | No | No | No  | N   | ...  |
| 155 [63]    | 1942 | ...  | ... | ... | ... | 46    | M | cut    | Yes | No  | No | Yes | ... | ...          | ... | No | No | No  | N   | 9    |
| 156 [63]    | 1942 | ...  | ... | ... | ... | 62    | M | cut    | Yes | No  | No | No  | ... | ...          | 3   | No | No | No  | N   | 15   |
| 157 [64]    | 1943 | ...  | ... | ... | ... | 71    | M | inhal  | Yes | No  | No | No  | ... | ...          | 3   | No | No | No  | 4.5 | 4.5  |
| 158 [65]    | 1944 | ...  | ... | ... | ... | 6     | M | ingest | ... | No  | No | Yes | ... | ...          | ... | No | No | No  | N   | 21   |
| 159 [65]    | 1944 | ...  | ... | ... | ... | 11    | M | ingest | ... | No  | No | Yes | ... | ...          | ... | No | No | No  | N   | 5    |
| 160 [66]    | 1944 | ...  | ... | ... | ... | 18    | F | cut    | ... | No  | No | No  | 1   | Bactericidal | ... | No | No | No  | N   | 9    |
| 161 [66]    | 1944 | ...  | ... | ... | ... | 34    | F | cut    | ... | No  | No | No  | 1   | Bactericidal | ... | No | No | No  | N   | 10   |
| 162 [66]    | 1944 | ...  | ... | ... | ... | 34    | F | cut    | Yes | No  | No | No  | 1   | Bactericidal | ... | No | No | No  | N   | 9    |
| 163 [67]    | 1945 | ...  | ... | ... | ... | 3     | F | cut    | ... | No  | No | Yes | ... | ...          | ... | No | No | No  | N   | 13   |
| 164 [68]    | 1945 | ...  | ... | ... | ... | 5     | F | cut    | Yes | No  | No | No  | 1   | Bactericidal | 3   | No | No | No  | N   | ...  |
| 165 [69]    | 1945 | ...  | ... | ... | ... | 22    | M | cut    | Yes | No  | No | No  | 1   | Bactericidal | ... | No | No | No  | N   | ...  |
| 166 [67]    | 1945 | ...  | ... | ... | ... | 22    | M | cut    | ... | No  | No | Yes | ... | ...          | ... | No | No | No  | N   | ...  |
| 167 [70]    | 1945 | ...  | ... | ... | ... | 70    | M | cut    | Yes | No  | No | No  | 1   | Bactericidal | ... | No | No | No  | N   | ...  |
| 168 [71]    | 1945 | ...  | ... | ... | ... | adult | M | cut    | Yes | No  | No | No  | 1   | Bactericidal | ... | No | No | No  | N   | 16   |
| 169 [72]    | 1947 | ...  | ... | ... | ... | 19    | M | cut    | Yes | No  | No | No  | 1   | Bactericidal | ... | No | No | No  | N   | ...  |
| 170 [73]    | 1947 | ...  | ... | ... | ... | 22    | M | ingest | Yes | No  | No | Yes | ... | ...          | ... | No | No | No  | 2   | 2    |
| 171 [74,75] | 1947 | 1948 | ... | ... | ... | 57    | M | cut    | Yes | Yes | No | No  | 1   | Bactericidal | 1   | No | No | Yes | N   | 21   |
| 172 [76]    | 1948 | ...  | ... | ... | ... | 9     | M | cut    | Yes | No  | No | Yes | ... | ...          | ... | No | No | No  | N   | 30   |
| 173 [76]    | 1948 | ...  | ... | ... | ... | 13    | F | cut    | Yes | No  | No | No  | 1   | Bactericidal | ... | No | No | No  | N   | 7    |
| 174 [77]    | 1948 | ...  | ... | ... | ... | 15    | M | cut    | Yes | No  | No | No  | 1   | Bactericidal | ... | No | No | No  | N   | 10   |
| 175 [75]    | 1948 | ...  | ... | ... | ... | 25    | M | cut    | ... | No  | No | No  | 1   | Bactericidal | ... | No | No | No  | N   | 9    |
| 176 [77]    | 1948 | ...  | ... | ... | ... | 27    | F | cut    | ... | No  | No | No  | 1   | Bactericidal | ... | No | No | No  | N   | ...  |
| 177 [75]    | 1948 | ...  | ... | ... | ... | 28    | M | cut    | ... | No  | No | No  | 1   | Bactericidal | ... | No | No | No  | N   | 11   |
| 178 [77]    | 1948 | ...  | ... | ... | ... | 29    | M | cut    | Yes | No  | No | No  | 1   | Bactericidal | ... | No | No | No  | N   | 8    |
| 179 [75]    | 1948 | ...  | ... | ... | ... | 29    | M | cut    | ... | No  | No | No  | 1   | Bactericidal | ... | No | No | No  | N   | 8    |

|             |           |     |     |     |     |       |   |     |     |     |     |    |     |              |     |    |    |     |   |     |
|-------------|-----------|-----|-----|-----|-----|-------|---|-----|-----|-----|-----|----|-----|--------------|-----|----|----|-----|---|-----|
| 180 [78]    | 1948      | ... | ... | ... | ... | 30    | M | NP  | Yes | Yes | No  | No | 1   | Bactericidal | ... | No | No | No  | 2 | 2   |
| 181 [77]    | 1948      | ... | ... | ... | ... | 31    | M | cut | Yes | No  | No  | No | 1   | Bactericidal | ... | No | No | No  | N | 8.5 |
| 182 [77]    | 1948      | ... | ... | ... | ... | 33    | M | cut | Yes | No  | No  | No | 1   | Bactericidal | ... | No | No | No  | N | 8   |
| 183 [75]    | 1948      | ... | ... | ... | ... | 33    | M | cut | ... | No  | No  | No | 1   | Bactericidal | ... | No | No | No  | N | 16  |
| 184 [75]    | 1948      | ... | ... | ... | ... | 35    | M | cut | ... | No  | No  | No | 1   | Bactericidal | ... | No | No | No  | N | 15  |
| 185 [75]    | 1948      | ... | ... | ... | ... | 36    | M | cut | ... | No  | No  | No | 1   | Bactericidal | ... | No | No | No  | N | 6   |
| 186 [75]    | 1948      | ... | ... | ... | ... | 38    | M | cut | ... | No  | No  | No | 1   | Bactericidal | ... | No | No | No  | N | 9   |
| 187 [75]    | 1948      | ... | ... | ... | ... | 40    | M | cut | ... | No  | No  | No | 1   | Bactericidal | ... | No | No | No  | N | 7   |
| 188 [75]    | 1948      | ... | ... | ... | ... | 40    | F | cut | ... | No  | No  | No | 1   | Bactericidal | ... | No | No | No  | N | 11  |
| 189 [75]    | 1948      | ... | ... | ... | ... | 48    | M | cut | Yes | No  | No  | No | 1   | Bactericidal | ... | No | No | No  | N | 33  |
| 190 [75]    | 1948      | ... | ... | ... | ... | 48    | M | cut | ... | No  | No  | No | 1   | Bactericidal | ... | No | No | No  | N | 8   |
| 191 [79]    | 1948      | ... | ... | ... | ... | 49    | M | cut | Yes | No  | No  | No | 1   | Bactericidal | ... | No | No | No  | N | 33  |
| 192 [79]    | 1948      | ... | ... | ... | ... | 51    | M | cut | Yes | Yes | No  | No | 1   | Bactericidal | ... | No | No | Yes | N | 43  |
| 193 [75]    | 1948      | ... | ... | ... | ... | 52    | M | cut | ... | No  | No  | No | 1   | Bactericidal | ... | No | No | No  | N | 12  |
| 194 [75]    | 1948      | ... | ... | ... | ... | 53    | M | cut | ... | No  | No  | No | 1   | Bactericidal | ... | No | No | No  | N | 5   |
| 195 [79]    | 1948      | ... | ... | ... | ... | 58    | M | cut | Yes | No  | No  | No | 1   | Bactericidal | ... | No | No | No  | N | 20  |
| 196 [75]    | 1948      | ... | ... | ... | ... | 59    | M | cut | ... | No  | No  | No | 1   | Bactericidal | ... | No | No | No  | N | 11  |
| 197 [75]    | 1948      | ... | ... | ... | ... | 65    | M | cut | Yes | No  | No  | No | 1   | Bactericidal | ... | No | No | No  | N | 15  |
| 198 [75]    | 1948      | ... | ... | ... | ... | 69    | M | cut | ... | No  | No  | No | 1   | Bactericidal | ... | No | No | No  | N | 11  |
| 199 [80]    | 1949      | ... | ... | ... | ... | 29    |   | cut | ... | No  | No  | No | 1   | Bactericidal | 1   | No | No | No  | N | 13  |
| 200 [80]    | 1949      | ... | ... | ... | ... | 29    |   | cut | ... | No  | No  | No | 1   | Bactericidal | 1   | No | No | No  | N | 19  |
| 201 [80]    | 1949      | ... | ... | ... | ... | 30    |   | cut | ... | No  | No  | No | 1   | Bactericidal | 1   | No | No | No  | N | 17  |
| 202 [81]    | 1949      | ... | ... | ... | ... | 36    | M | cut | Yes | No  | Yes | No | ... | ...          | ... | No | No | No  | N | ... |
| 203 [80]    | 1949      | ... | ... | ... | ... | 42    |   | cut | ... | No  | No  | No | 1   | Bactericidal | 1   | No | No | No  | N | 16  |
| 204 [80]    | 1949      | ... | ... | ... | ... | 48    |   | cut | ... | No  | No  | No | 1   | Bactericidal | 1   | No | No | No  | N | 17  |
| 205 [80]    | 1949      | ... | ... | ... | ... | 49    |   | cut | ... | No  | No  | No | 1   | Bactericidal | 1   | No | No | No  | N | 13  |
| 206 [80]    | 1949      | ... | ... | ... | ... | 50    |   | cut | ... | No  | No  | No | 1   | Bactericidal | 1   | No | No | No  | N | 24  |
| 207 [80]    | 1949      | ... | ... | ... | ... | 53    |   | cut | ... | No  | No  | No | 1   | Bactericidal | 1   | No | No | No  | N | 33  |
| 208 [82]    | 1950      | ... | ... | ... | ... | 27    | F | cut | ... | No  | No  | No | 1   | PSI          | ... | No | No | No  | N | 17  |
| 209 [82]    | 1950      | ... | ... | ... | ... | 52    | M | cut | ... | No  | No  | No | 1   | PSI          | ... | No | No | No  | N | 14  |
| 210 [83]    | 1951      | ... | ... | ... | ... | 19    | M | cut | ... | No  | No  | No | 1   | PSI          | ... | No | No | No  | N | ... |
| 211 [83]    | 1951      | ... | ... | ... | ... | 23    | F | cut | ... | No  | No  | No | 1   | PSI          | ... | No | No | No  | N | ... |
| 212 [83]    | 1951      | ... | ... | ... | ... | 28    | F | cut | Yes | No  | No  | No | 1   | PSI          | ... | No | No | No  | N | ... |
| 213 [83,84] | 1951 1954 | ... | ... | ... | ... | 34    | F | cut | ... | No  | No  | No | 1   | PSI          | ... | No | No | No  | N | 6   |
| 214 [83]    | 1951      | ... | ... | ... | ... | 36    | M | cut | ... | No  | No  | No | 1   | PSI          | ... | No | No | No  | N | ... |
| 215 [83]    | 1951      | ... | ... | ... | ... | 41    | F | cut | ... | No  | No  | No | ... | ...          | ... | No | No | No  | N | ... |
| 216 [83]    | 1951      | ... | ... | ... | ... | 45    | M | cut | ... | No  | Yes | No | 1   | PSI          | ... | No | No | No  | N | ... |
| 217 [83]    | 1951      | ... | ... | ... | ... | 45    | F | cut | ... | No  | No  | No | 1   | PSI          | ... | No | No | No  | N | ... |
| 218 [84]    | 1952      | ... | ... | ... | ... | 0.83  |   | cut | Yes | No  | No  | No | 1   | PSI          | ... | No | No | No  | N | ... |
| 219 [84]    | 1952      | ... | ... | ... | ... | 10    | M | cut | Yes | No  | No  | No | 1   | PSI          | ... | No | No | No  | N | ... |
| 220 [84]    | 1952      | ... | ... | ... | ... | 12    | F | cut | Yes | No  | No  | No | 1   | PSI          | ... | No | No | No  | N | ... |
| 221 [86]    | 1952      | ... | ... | ... | ... | 29    | F | ... | Yes | Yes | No  | No | 1   | PSI          | ... | No | No | No  | 2 | 1.5 |
| 222 [84]    | 1952      | ... | ... | ... | ... | 35    | M | cut | Yes | No  | No  | No | 1   | Bactericidal | ... | No | No | No  | N | .   |
| 223 [84]    | 1952      | ... | ... | ... | ... | 55    | M | cut | Yes | No  | No  | No | 1   | PSI          | ... | No | No | No  | N | 12  |
| 224 [86]    | 1952      | ... | ... | ... | ... | 61    | M | ... | Yes | Yes | Yes | No | ... | ...          | ... | No | No | Yes | 2 | 0.5 |
| 225 [87]    | 1953      | ... | ... | ... | ... | adult | M | cut | Yes | No  | Yes | No | ... | ...          | ... | No | No | No  | N | 8   |

|               |      |      |     |     |     |       |   |        |                  |     |     |     |     |              |     |     |    |     |   |     |
|---------------|------|------|-----|-----|-----|-------|---|--------|------------------|-----|-----|-----|-----|--------------|-----|-----|----|-----|---|-----|
| 226 [88]      | 1954 | ...  | ... | ... | ... | 30    | M | inhal  | Yes              | Yes | No  | No  | 1   | Bactericidal | 1   | No  | No | No  | 3 | 3   |
| 227 [84]      | 1954 | ...  | ... | ... | ... | 36    | F | cut    | Yes              | No  | No  | No  | 1   | PSI          | ... | No  | No | No  | N | ... |
| 228 [89]      | 1955 | ...  | ... | ... | ... | 42    | M | inhal  | Yes              | No  | No  | Yes | ... | ...          | ... | No  | No | No  | 3 | 2.5 |
| 229 [90]      | 1955 | ...  | ... | ... | ... | adult | M | cut    | ...              | No  | No  | No  | 2   | Bactericidal | Y   | No  | No | No  | N | ... |
| 230 [90]      | 1955 | ...  | ... | ... | ... | NR    | M | cut    | ...              | No  | No  | No  | 3+  | Both         | Y   | No  | No | No  | Y | ... |
| 231 [90]      | 1955 | ...  | ... | ... | ... | NR    | M | cut    | ...              | No  | No  | No  | 2   | Bactericidal | ... | No  | No | No  | N | ... |
| 232 [90]      | 1955 | ...  | ... | ... | ... | NR    | M | cut    | ...              | No  | No  | No  | 2   | Bactericidal | ... | No  | No | No  | N | ... |
| 233 [90]      | 1955 | ...  | ... | ... | ... | NR    | M | cut    | ...              | No  | No  | No  | 2   | Bactericidal | ... | No  | No | No  | N | ... |
| 234 [90]      | 1955 | ...  | ... | ... | ... | NR    | M | cut    | ...              | No  | No  | No  | 2   | Bactericidal | ... | No  | No | No  | N | ... |
| 235 [91]      | 1956 | ...  | ... | ... | ... | adult | M | cut    | Yes              | No  | No  | No  | 3+  | Both         | ... | No  | No | No  | N | 13  |
| 236 [92]      | 1957 | ...  | ... | ... | ... | 37    | F | cut    | Yes              | No  | No  | No  | 1   | Bactericidal | ... | No  | No | No  | N | ... |
| 237 [93]      | 1958 | ...  | ... | ... | ... | 17    | M | cut    | Yes              | No  | No  | No  | ... | ...          | ... | No  | No | No  | N | ... |
| 238 [94]      | 1960 | ...  | ... | ... | ... | 32    | F | cut    | Yes              | Yes | No  | No  | ... | ...          | Y   | No  | No | No  | 2 | 1.5 |
| 239 [95]      | 1960 | ...  | ... | ... | ... | 46    | M | inhal  | Yes              | No  | No  | No  | 2   | Bactericidal | ... | No  | No | No  | N | 122 |
| 240 [95,96]   | 1960 | 1960 | ... | ... | ... | 49    | M | inhal  | Yes              | Yes | No  | No  | 2   | Bactericidal | ... | No  | No | No  | 2 | 0.5 |
| 241 [94]      | 1960 | ...  | ... | ... | ... | 64    | M | cut    | Yes              | Yes | No  | No  | 2   | Both         | 5   | No  | No | Yes | 5 | 5   |
| 242 [95]      | 1960 | ...  | ... | ... | ... | 65    | F | inhal  | Yes              | No  | No  | No  | ... | ...          | ... | Yes | No | No  | 3 | 3   |
| 243 [97]      | 1964 | ...  | ... | ... | ... | 15    | M | cut    | Yes              | No  | No  | No  | 1   | Bactericidal | ... | Yes | No | No  | N | 27  |
| 244 [97]      | 1964 | ...  | ... | ... | ... | 16    | M | cut    | Yes              | No  | No  | No  | 1   | Bactericidal | ... | Yes | No | No  | N | 25  |
| 245 [97]      | 1964 | ...  | ... | ... | ... | 27    |   | cut    | Yes              | No  | No  | No  | 1   | Bactericidal | ... | No  | No | No  | N | 19  |
| 246 [97]      | 1964 | ...  | ... | ... | ... | 30    | M | inhal  | Yes              | Yes | No  | No  | 3+  | Both         | ... | No  | No | No  | 4 | 3.2 |
| 247 [97]      | 1964 | ...  | ... | ... | ... | 30    | F | cut    | Yes              | Yes | No  | No  | 1   | Bactericidal | ... | No  | No | No  | 4 | 4   |
| 248 [97]      | 1964 | ...  | ... | ... | ... | 32    | M | cut    | Yes              | No  | No  | No  | 1   | Bactericidal | ... | No  | No | No  | N | 15  |
| 249 [97]      | 1964 | ...  | ... | ... | ... | 33    | M | cut    | ...              | No  | No  | No  | 2   | Both         | ... | No  | No | No  | N | 23  |
| 250 [97]      | 1964 | ...  | ... | ... | ... | 48    | M | cut    | Yes              | No  | No  | No  | 2   | Bactericidal | ... | Yes | No | No  | N | 22  |
| 251 [97]      | 1964 | ...  | ... | ... | ... | 50    | M | cut    | Yes              | No  | No  | No  | 1   | Bactericidal | ... | No  | No | No  | N | 27  |
| 252 [97]      | 1964 | ...  | ... | ... | ... | 50    | M | cut    | ...              | No  | No  | No  | 1   | Bactericidal | ... | No  | No | No  | N | 18  |
| 253 [97]      | 1964 | ...  | ... | ... | ... | 55    | M | cut    | ...              | No  | No  | No  | 1   | Bactericidal | ... | No  | No | No  | N | 14  |
| 254 [97]      | 1964 | ...  | ... | ... | ... | 60    | M | cut    | Yes <sup>a</sup> | No  | No  | No  | 1   | Bactericidal | ... | No  | No | No  | 5 | 5   |
| 255 [97]      | 1964 | ...  | ... | ... | ... | 60    | M | cut    | ...              | No  | No  | No  | 1   | Bactericidal | ... | No  | No | No  | N | 14  |
| 256 [98]      | 1966 | ...  | ... | ... | ... | 54    | F | inhal  | Yes              | No  | Yes | No  | ... | ...          | ... | No  | No | No  | 2 | 2   |
| 257 [99]      | 1968 | ...  | ... | ... | ... | 60    | M | ingest | Yes              | No  | No  | No  | 2   | Bactericidal | ... | No  | No | No  | 3 | 3   |
| 258 [100]     | 1970 | ...  | ... | ... | ... | 20    | F | ingest | Yes              | No  | No  | No  | 2   | Bactericidal | ... | No  | No | No  | 2 | 1.5 |
| 259 [101]     | 1970 | ...  | ... | ... | ... | 22    | M | cut    | ...              | No  | No  | No  | 1   | Bactericidal | ... | No  | No | No  | N | ... |
| 260 [102]     | 1970 | ...  | ... | ... | ... | NR    | M | ingest | ...              | No  | No  | No  | 1   | PSI          | ... | No  | No | No  | N | ... |
| 261 [103]     | 1972 | ...  | ... | ... | ... | 8.5   | F | cut    | Yes              | Yes | No  | No  | 1   | PSI          | ... | Yes | No | No  | N | 24  |
| 262 [104]     | 1973 | ...  | ... | ... | ... | 12    | M | cut    | Yes              | Yes | No  | No  | 2   | Bactericidal | ... | No  | No | No  | N | 14  |
| 263 [105]     | 1973 | ...  | ... | ... | ... | 44    | M | ...    | Yes              | Yes | No  | Yes | ... | ...          | ... | No  | No | No  | Y | 1   |
| 264 [104]     | 1973 | ...  | ... | ... | ... | 50    | M | cut    | Yes              | Yes | No  | No  | ... | ...          | ... | No  | No | No  | 4 | 2   |
| 265 [106]     | 1974 | ...  | ... | ... | ... | 68    | M | cut    | Yes              | No  | Yes | No  | 1   | Bactericidal | ... | Yes | No | No  | 8 | 8   |
| 266 [107]     | 1975 | ...  | ... | ... | ... | 16    | F | inhal  | Yes              | No  | No  | No  | 2   | Both         | ... | No  | No | No  | 3 | 3   |
| 267 [108]     | 1975 | ...  | ... | ... | ... | 36    | M | cut    | Yes              | Yes | No  | No  | 1   | Bactericidal | ... | No  | No | No  | 2 | 1.5 |
| 268 [109]     | 1977 | ...  | ... | ... | ... | 0.25  | M | ingest | Yes              | No  | No  | No  | 2   | Both         | ... | No  | No | No  | N | .   |
| 269 [110]     | 1977 | ...  | ... | ... | ... | 17    | M | ingest | Yes              | Yes | No  | No  |     | Both         | ... | No  | No | No  | N | .   |
| 270 [111,112] | 1978 | 1980 | ... | ... | ... | 32    | M | inhal  | Yes              | Yes | No  | No  | 3+  | Both         | ... | No  | No | No  | 2 | 2   |
| 271 [113]     | 1979 | ...  | ... | ... | ... | 10    | M | cut    | Yes              | No  | No  | No  | 1   | Bactericidal | ... | No  | No | No  | N | ... |

|               |           |     |     |     |     |      |   |        |                  |     |     |     |     |              |     |     |     |    |    |      |
|---------------|-----------|-----|-----|-----|-----|------|---|--------|------------------|-----|-----|-----|-----|--------------|-----|-----|-----|----|----|------|
| 272 [113]     | 1979      | ... | ... | ... | ... | 11   | M | cut    | ...              | No  | No  | No  | 1   | Bactericidal | ... | No  | No  | No | N  | ...  |
| 273 [113]     | 1979      | ... | ... | ... | ... | 12   | F | cut    | ...              | No  | No  | No  | 1   | Bactericidal | ... | No  | No  | No | N  | ...  |
| 274 [113]     | 1979      | ... | ... | ... | ... | 13   | F | cut    | Yes              | Yes | No  | No  | 1   | Bactericidal | ... | Yes | No  | No | 4  | 4    |
| 275 [114]     | 1980      | ... | ... | ... | ... | 25   | M | ingest | Yes              | No  | No  | No  | ... | ...          | ... | No  | No  | No | N  | 21   |
| 276 [112]     | 1980      | ... | ... | ... | ... | 51   | F | inhal  | Yes              | No  | No  | Yes | ... | ...          | ... | No  | No  | No | 2  | 2    |
| 277 [112]     | 1980      | ... | ... | ... | ... | 53   | M | inhal  | Yes              | No  | No  | No  | 1   | PSI          | ... | No  | No  | No | 5  | 5.2  |
| 278 [115]     | 1981      | ... | ... | ... | ... | 9    | F | cut    | Yes              | Yes | No  | No  | 2   | Both         | ... | No  | No  | No | 4  | 1    |
| 279 [115]     | 1981      | ... | ... | ... | ... | 56   | F | cut    | Yes              | Yes | No  | No  | 2   | Both         | ... | Yes | No  | No | 2  | 1.5  |
| 280 [115]     | 1981      | ... | ... | ... | ... | 58   | M | cut    | Yes              | Yes | No  | No  | 1   | Bactericidal | ... | No  | No  | No | 4  | 1    |
| 281 [116]     | 1983      | ... | ... | ... | ... | 45   | F | ...    | Yes              | Yes | No  | No  | 2   | Both         | ... | No  | No  | No | 2  | 2    |
| 282 [117]     | 1983      | ... | ... | ... | ... | 52   | M | cut    | Yes              | No  | No  | No  | 1   | PSI          | ... | No  | No  | No | N  | .    |
| 283 [118]     | 1986      | ... | ... | ... | ... | 18   | F | ingest | Yes              | Yes | No  | No  | 2   | Bactericidal | ... | No  | No  | No | 2  | 1.5  |
| 284 [118]     | 1986      | ... | ... | ... | ... | 26   | F | ingest | Yes              | No  | No  | No  | 1   | Bactericidal | ... | No  | No  | No | N  | ...  |
| 285 [118]     | 1986      | ... | ... | ... | ... | 40   | F | ingest | Yes              | No  | No  | No  | 1   | Bactericidal | ... | No  | No  | No | N  | ...  |
| 286 [118]     | 1986      | ... | ... | ... | ... | 46   | F | ingest | Yes              | No  | No  | No  | 1   | Bactericidal | ... | No  | No  | No | N  | ...  |
| 287 [119]     | 1987      | ... | ... | ... | ... | 9    | M | cut    | ...              | No  | No  | No  | 1   | Bactericidal | ... | Yes | No  | No | N  | 10   |
| 288 [120]     | 1989      | ... | ... | ... | ... | 25   | M | ...    | Yes              | Yes | No  | No  | 1   | Bactericidal | ... | Yes | Yes | No | N  | 56   |
| 289 [121]     | 1990      | ... | ... | ... | ... | 25   | M | cut    | Yes              | Yes | No  | Yes | ... | ...          | ... | No  | No  | No | Y  | 2    |
| 290 [121]     | 1990      | ... | ... | ... | ... | 40   | M | ...    | Yes              | Yes | No  | Yes | ... | ...          | ... | No  | No  | No | Y  | 2    |
| 291 [122]     | 1990      | ... | ... | ... | ... | 42   | M | ingest | Yes              | No  | No  | No  | 1   | Bactericidal | ... | No  | No  | No | Y  | ...  |
| 292 [121]     | 1990      | ... | ... | ... | ... | 55   | F | inject | Yes              | No  | No  | No  | 1   | Bactericidal | ... | No  | No  | No | N  | 20   |
| 293 [123]     | 1991      | ... | ... | ... | ... | 37   | M | inhal  | Yes              | No  | No  | No  | 3+  | Both         | ... | No  | No  | No | N  | .    |
| 294 [124]     | 1991      | ... | ... | ... | ... | 54   | F | inhal  | Yes              | Yes | No  | No  | 2   | Both         | ... | No  | No  | No | 4  | 4    |
| 295 [125]     | 1992      | ... | ... | ... | ... | 30   | M | ...    | Yes              | Yes | No  | No  | 2   | Both         | ... | No  | Yes | No | 2  | 2    |
| 296 [126]     | 1992      | ... | ... | ... | ... | 32   | F | cut    | ...              | No  | No  | No  | 1   | Bactericidal | ... | No  | No  | No | N  | ...  |
| 297 [127]     | 1992      | ... | ... | ... | ... | 43   | M | cut    | Yes              | No  | Yes | No  | 2   | Bactericidal | ... | Yes | No  | No | N  | ...  |
| 298 [128]     | 1993      | ... | ... | ... | ... | 6    | M | ingest | Yes              | Yes | No  | No  | 2   | Bactericidal | ... | No  | No  | No | N  | 14   |
| 299 [126]     | 1993      | ... | ... | ... | ... | 43   | M | cut    | ...              | No  | No  | No  | 1   | Bactericidal | ... | No  | No  | No | N  | ...  |
| 300 [129]     | 1993      | ... | ... | ... | ... | 68   | F | inhal  | Yes <sup>a</sup> | Yes | No  | Yes | ... | ...          | ... | No  | No  | No | 9  | 9    |
| 301 [130]     | 1994      | ... | ... | ... | ... | 33   | M | inhal  | Yes              | No  | No  | No  | 1   | Bactericidal | ... | No  | No  | No | 7  | 7    |
| 302 [131]     | 1994      | ... | ... | ... | ... | 41   | M | cut    | ...              | No  | No  | No  | 1   | Bactericidal | ... | Yes | No  | No | N  | 26   |
| 303 [126]     | 1994      | ... | ... | ... | ... | 45   | F | cut    | ...              | No  | No  | No  | 1   | Bactericidal | ... | No  | No  | No | N  | ...  |
| 304 [132]     | 1994      | ... | ... | ... | ... | 55   | M | cut    | ...              | No  | No  | No  | 1   | Bactericidal | ... | No  | No  | No | N  | ...  |
| 305 [133]     | 1995      | ... | ... | ... | ... | 13   | M | inhal  | Yes              | Yes | No  | No  | 1   | Bactericidal | ... | No  | No  | No | Y  | ...  |
| 306 [134]     | 1996      | ... | ... | ... | ... | 11   | F | ingest | Yes              | Yes | No  | Yes | ... | ...          | ... | No  | No  | No | 2  | 2    |
| 307 [135]     | 1997      | ... | ... | ... | ... | 4    | M | cut    | ...              | No  | No  | No  | 1   | Bactericidal | ... | No  | No  | No | N  | 20   |
| 308 [136,137] | 1997 2002 | ... | ... | ... | ... | 13   | M | ingest | Yes              | Yes | No  | No  | ... | Both         | ... | No  | Yes | No | 5  | 4    |
| 309 [138]     | 1997      | ... | ... | ... | ... | 39   | M | cut    | ...              | No  | Yes | No  | ... | ...          | ... | No  | No  | No | N  | .    |
| 310 [139]     | 1997      | ... | ... | ... | ... | 50   | M | cut    | Yes              | Yes | No  | Yes | ... | ...          | ... | No  | No  | No | 14 | 14   |
| 311 [140]     | 1997      | ... | ... | ... | ... | 57   | M | cut    | Yes              | No  | No  | No  | 1   | Bactericidal | ... | No  | No  | No | N  | 14   |
| 312 [141]     | 1999      | ... | ... | ... | ... | 15   | F | cut    | ...              | No  | No  | No  | 1   | Bactericidal | ... | No  | No  | No | N  | 10.5 |
| 313 [142]     | 1999      | ... | ... | ... | ... | 16   | M | cut    | Yes              | No  | No  | No  | 2   | Bactericidal | ... | Yes | No  | No | N  | 16   |
| 314 [141]     | 1999      | ... | ... | ... | ... | 18   | F | cut    | ...              | No  | No  | No  | 1   | Bactericidal | ... | No  | No  | No | N  | 10.5 |
| 315 [141]     | 1999      | ... | ... | ... | ... | 42   | M | cut    | ...              | No  | No  | No  | 1   | Bactericidal | ... | No  | No  | No | N  | 6.5  |
| 316 [143]     | 1999      | ... | ... | ... | ... | 49   | M | cut    | Yes              | Yes | No  | No  | 1   | Bactericidal | ... | No  | No  | No | 7  | 7    |
| 317 [144]     | 2000      | ... | ... | ... | ... | 0.07 | M | cut    | Yes              | No  | Yes | No  | 2   | Bactericidal | ... | No  | No  | No | N  | 28   |

|                   |                               |     |     |     |     |      |   |        |     |     |     |     |     |              |     |     |    |    |     |      |
|-------------------|-------------------------------|-----|-----|-----|-----|------|---|--------|-----|-----|-----|-----|-----|--------------|-----|-----|----|----|-----|------|
| 318 [145]         | 2000                          | ... | ... | ... | ... | 49   | M | inject | Yes | Yes | Yes | No  | 1   | PSI          | ... | Yes | No | No | 4   | 4    |
| 319 [146]         | 2001                          | ... | ... | ... | ... | 0.83 | F | cut    | Yes | No  | No  | No  | 1   | Bactericidal | ... | No  | No | No | N   | ...  |
| 320 [147]         | 2001                          | ... | ... | ... | ... | 5    | M | cut    | Yes | No  | No  | No  | 1   | Bactericidal | ... | No  | No | No | N   | 14   |
| 321 [148]         | 2001                          | ... | ... | ... | ... | 7    | M | cut    | ... | No  | No  | No  | 1   | Bactericidal | ... | No  | No | No | N   | ...  |
| 322 [148]         | 2001                          | ... | ... | ... | ... | 8    | M | cut    | ... | No  | No  | No  | 1   | Bactericidal | ... | No  | No | No | N   | ...  |
| 323 [148]         | 2001                          | ... | ... | ... | ... | 8    | M | cut    | ... | No  | No  | No  | 1   | Bactericidal | ... | No  | No | No | N   | ...  |
| 324 [148]         | 2001                          | ... | ... | ... | ... | 8    | M | cut    | ... | No  | No  | No  | 1   | Bactericidal | ... | No  | No | No | N   | ...  |
| 325 [148]         | 2001                          | ... | ... | ... | ... | 9    | F | cut    | ... | No  | No  | No  | 1   | Bactericidal | ... | No  | No | No | N   | ...  |
| 326 [149]         | 2001                          | ... | ... | ... | ... | 20   | F | cut    | Yes | No  | No  | No  | ... | Both         | ... | No  | No | No | N   | 14   |
| 327 [148]         | 2001                          | ... | ... | ... | ... | 25   | F | cut    | ... | No  | No  | No  | 1   | Bactericidal | ... | No  | No | No | N   | ...  |
| 328 [148]         | 2001                          | ... | ... | ... | ... | 30   | M | cut    | ... | No  | No  | No  | 1   | Bactericidal | ... | No  | No | No | N   | ...  |
| 329 [150,151]     | 2001 2014                     | ... | ... | ... | ... | 35   | M | cut    | Yes | No  | No  | No  | 2   | Bactericidal | ... | No  | No | No | N   | ...  |
| 330 [148]         | 2001                          | ... | ... | ... | ... | 37   | F | cut    | ... | No  | No  | No  | 1   | Bactericidal | ... | No  | No | No | N   | ...  |
| 331 [152,153,154] | 2001 2001 2003                | ... | ... | ... | ... | 43   | F | inhal  | Yes | No  | Yes | No  | 2   | PSI          | ... | No  | No | No | N   | 5    |
| 332 [152,155,156] | 2001 2001 2002 2003           | ... | ... | ... | ... | 47   | M | inhal  | Yes | No  | No  | No  | 3+  | Bactericidal | ... | No  | No | No | 2   | 0.25 |
| 333 [157]         | 2001                          | ... | ... | ... | ... | 53   | M | cut    | Yes | Yes | No  | No  | 1   | Bactericidal | ... | No  | No | No | 6   | 6    |
| 334 [158]         | 2001                          | ... | ... | ... | ... | 54   | F | cut    | Yes | No  | No  | No  | 1   | Bactericidal | ... | No  | No | No | N   | ...  |
| 335 [152,159]     | 2001 2001                     | ... | ... | ... | ... | 56   | M | inhal  | Yes | No  | No  | No  | 3+  | Both         | ... | Yes | No | No | N   | 21   |
| 336 [152,159]     | 2001 2001                     | ... | ... | ... | ... | 56   | M | inhal  | Yes | Yes | No  | No  | 3+  | Both         | ... | Yes | No | No | N   | 21   |
| 337 [152,154]     | 2001 2003                     | ... | ... | ... | ... | 56   | F | inhal  | Yes | No  | No  | No  | 2   | Bactericidal | ... | No  | No | No | N   | 18   |
| 338 [152,153]     | 2001 2001                     | ... | ... | ... | ... | 59   | M | inhal  | Yes | Yes | No  | No  | 3+  | Bactericidal | ... | No  | No | No | N   | 16   |
| 339 [152,153,160] | 2001 2001 2002 2002 2003 2003 | ... | ... | ... | ... | 61   | F | inhal  | Yes | No  | No  | No  | 3+  | Both         | ... | No  | No | No | 4   | 4    |
| 340 [152,154,161] | 2001 2001 2003                | ... | ... | ... | ... | 63   | M | inhal  | Yes | Yes | No  | No  | 3+  | Both         | ... | No  | No | No | 3.5 | 4    |
| 341 [157]         | 2001                          | ... | ... | ... | ... | 72   | F | cut    | Yes | Yes | No  | Yes | ... | ...          | ... | No  | No | No | 2   | 2    |
| 342 [152,154]     | 2001 2003                     | ... | ... | ... | ... | 73   | M | inhal  | Yes | No  | No  | No  | 2   | Both         | ... | No  | No | No | N   | 17   |
| 343 [154,162,163] | 2001 2002 2003                | ... | ... | ... | ... | 94   | F | inhal  | Yes | No  | No  | No  | 3+  | Bactericidal | ... | Yes | No | No | 6   | 6    |
| 344 [164]         | 2002                          | ... | ... | ... | ... | 0.58 | M | cut    | Yes | No  | No  | No  | 1   | Bactericidal | ... | Yes | No | No | N   | 15   |
| 345 [165]         | 2002                          | ... | ... | ... | ... | 21   | F | ingest | Yes | No  | No  | No  | 1   | PSI          | ... | No  | No | No | 2   | 0.46 |
| 346 [137]         | 2002                          | ... | ... | ... | ... | 28   | M | cut    | ... | No  | No  | No  | 1   | PSI          | ... | No  | No | No | N   | 10   |
| 347 [137]         | 2002                          | ... | ... | ... | ... | 42   | M | cut    | ... | No  | Yes | No  | 1   | Bactericidal | ... | No  | No | No | N   | 11   |
| 348 [166]         | 2003                          | ... | ... | ... | ... | 7    | M | ingest | Yes | No  | No  | No  | 1   | Bactericidal | ... | No  | No | No | N   | 9    |
| 349 [166]         | 2003                          | ... | ... | ... | ... | 15   | M | ingest | Yes | No  | No  | No  | 1   | Bactericidal | ... | No  | No | No | N   | 10   |
| 350 [167]         | 2003                          | ... | ... | ... | ... | 15   | M | ingest | Yes | No  | No  | Yes | ... | ...          | ... | No  | No | No | 3   | 3    |
| 351 [166]         | 2003                          | ... | ... | ... | ... | 17   | M | ingest | Yes | No  | No  | No  | 2   | Bactericidal | ... | No  | No | No | N   | 18   |
| 352 [166]         | 2003                          | ... | ... | ... | ... | 20   | F | ingest | Yes | No  | No  | Yes | ... | ...          | ... | No  | No | No | N   | 12   |
| 353 [166]         | 2003                          | ... | ... | ... | ... | 24   | M | ingest | Yes | No  | No  | No  | 1   | Bactericidal | ... | No  | No | No | N   | 7    |
| 354 [168]         | 2003                          | ... | ... | ... | ... | 29   | F | cut    | Yes | No  | No  | No  | 1   | Bactericidal | ... | No  | No | No | N   | 7    |
| 355 [168]         | 2003                          | ... | ... | ... | ... | 33   | F | cut    | Yes | No  | No  | No  | 1   | Bactericidal | ... | Yes | No | No | N   | ...  |
| 356 [169]         | 2003                          | ... | ... | ... | ... | 48   | M | cut    | ... | Yes | No  | No  | 1   | Bactericidal | ... | Yes | No | No | N   | 14   |
| 357 [170]         | 2005                          | ... | ... | ... | ... | 10   | M | NP     | Yes | No  | No  | No  | 2   | Bactericidal | ... | No  | No | No | 2   | 1.4  |
| 358 [171]         | 2005                          | ... | ... | ... | ... | 36   | M | cut    | Yes | Yes | No  | No  | 1   | Bactericidal | ... | No  | No | No | 2.5 | 2.5  |
| 359 [172]         | 2006                          | ... | ... | ... | ... | 11   | M | cut    | Yes | Yes | No  | No  | 1   | Bactericidal | ... | Yes | No | No | 4   | 3.3  |
| 360 [173]         | 2006                          | ... | ... | ... | ... | 12   | M | ingest | Yes | No  | No  | No  | 1   | Bactericidal | ... | No  | No | No | N   | ...  |
| 361 [174]         | 2006                          | ... | ... | ... | ... | 12   | M | cut    | Yes | Yes | No  | Yes | ... | ...          | ... | No  | No | No | 2   | 2    |
| 362 [173]         | 2006                          | ... | ... | ... | ... | 14   | F | ingest | Yes | No  | No  | No  | 1   | Bactericidal | ... | No  | No | No | N   | ...  |
| 363 [175]         | 2006                          | ... | ... | ... | ... | 16   | M | cut    | ... | No  | No  | No  | 1   | Bactericidal | ... | No  | No | No | N   | ...  |

|               |      |      |     |     |     |       |   |        |     |     |    |    |     |              |     |     |     |    |    |      |
|---------------|------|------|-----|-----|-----|-------|---|--------|-----|-----|----|----|-----|--------------|-----|-----|-----|----|----|------|
| 364 [176]     | 2006 | ...  | ... | ... | ... | 25    | M | ingest | Yes | No  | No | No | ... | ...          | ... | No  | No  | No | N  | 10   |
| 365 [175]     | 2006 | ...  | ... | ... | ... | 26    | M | cut    | Yes | No  | No | No | 1   | Bactericidal | ... | No  | No  | No | N  | ...  |
| 366 [175]     | 2006 | ...  | ... | ... | ... | 27    | M | cut    | Yes | No  | No | No | 1   | Bactericidal | ... | No  | No  | No | N  | ...  |
| 367 [177]     | 2006 | ...  | ... | ... | ... | 31    | F | cut    | ... | No  | No | No | 3+  | Both         | ... | No  | No  | No | N  | 6    |
| 368 [175]     | 2006 | ...  | ... | ... | ... | 32    | M | cut    | ... | No  | No | No | 1   | Bactericidal | ... | No  | No  | No | N  | ...  |
| 369 [175]     | 2006 | ...  | ... | ... | ... | 34    | M | cut    | ... | No  | No | No | 1   | Bactericidal | ... | No  | No  | No | N  | ...  |
| 370 [173]     | 2006 | ...  | ... | ... | ... | 34    | F | ingest | Yes | Yes | No | No | 1   | Bactericidal | ... | No  | No  | No | 3  | 3    |
| 371 [175]     | 2006 | ...  | ... | ... | ... | 35    | F | cut    | ... | No  | No | No | 1   | Bactericidal | ... | No  | No  | No | N  | ...  |
| 372 [178,179] | 2006 | 2007 | ... | ... | ... | 44    | M | inhal  | Yes | No  | No | No | 3+  | Both         | 8   | No  | No  | No | N  | 35   |
| 373 [175]     | 2006 | ...  | ... | ... | ... | 47    | M | cut    | ... | No  | No | No | 1   | Bactericidal | ... | No  | No  | No | N  | ...  |
| 374 [175]     | 2006 | ...  | ... | ... | ... | 55    | M | cut    | Yes | No  | No | No | 1   | Bactericidal | ... | No  | No  | No | N  | ...  |
| 375 [175]     | 2006 | ...  | ... | ... | ... | 60    | M | cut    | ... | No  | No | No | 2   | Bactericidal | ... | No  | No  | No | N  | ...  |
| 376 [180]     | 2007 | ...  | ... | ... | ... | 4     | M | cut    | Yes | No  | No | No | 1   | Bactericidal | ... | No  | No  | No | 9  | 9    |
| 377 [181]     | 2007 | ...  | ... | ... | ... | 5     | F | cut    | ... | No  | No | No | 1   | Bactericidal | ... | No  | No  | No | N  | ...  |
| 378 [182]     | 2007 | ...  | ... | ... | ... | 28    | M | cut    | ... | No  | No | No | 3+  | Bactericidal | ... | No  | No  | No | N  | ...  |
| 379 [182]     | 2007 | ...  | ... | ... | ... | 29    | F | cut    | ... | No  | No | No | 3+  | Bactericidal | ... | No  | No  | No | N  | ...  |
| 380 [182]     | 2007 | ...  | ... | ... | ... | 30    | M | cut    | ... | No  | No | No | 3+  | Bactericidal | ... | No  | No  | No | N  | ...  |
| 381 [182]     | 2007 | ...  | ... | ... | ... | 32    | M | cut    | ... | No  | No | No | 3+  | Bactericidal | ... | No  | No  | No | N  | ...  |
| 382 [182]     | 2007 | ...  | ... | ... | ... | 36    | M | cut    | ... | No  | No | No | 3+  | Bactericidal | ... | No  | No  | No | N  | ...  |
| 383 [182]     | 2007 | ...  | ... | ... | ... | 54    | F | cut    | ... | No  | No | No | 3+  | Bactericidal | ... | No  | No  | No | N  | ...  |
| 384 [183]     | 2007 | ...  | ... | ... | ... | 60    | M | cut    | ... | No  | No | No | 3+  | Both         | ... | No  | No  | No | N  | 14   |
| 385 [184]     | 2007 | ...  | ... | ... | ... | 70    | M | ...    | Yes | Yes | No | No | ... | Both         | ... | No  | Yes | No | N  | 10   |
| 386 [180]     | 2007 | ...  | ... | ... | ... | 87    | M | cut    | Yes | No  | No | No | 1   | Bactericidal | ... | No  | No  | No | 4  | 4    |
| 387 [185]     | 2008 | ...  | ... | ... | ... | 17    | F | cut    | ... | No  | No | No | 1   | Bactericidal | ... | No  | No  | No | N  | .    |
| 388 [185]     | 2008 | ...  | ... | ... | ... | 45    | F | cut    | ... | No  | No | No | 1   | Bactericidal | ... | Yes | No  | No | N  | ...  |
| 389 [185]     | 2008 | ...  | ... | ... | ... | 52    | F | cut    | ... | No  | No | No | 1   | Bactericidal | ... | Yes | No  | No | N  | ...  |
| 390 [186]     | 2008 | ...  | ... | ... | ... | adult | M | inhal  | Yes | No  | No | No | 1   | Bactericidal | 7   | No  | No  | No | 13 | 12.5 |
| 391 [187]     | 2009 | ...  | ... | ... | ... | 16    | M | cut    | ... | No  | No | No | 1   | Bactericidal | ... | No  | No  | No | N  | ...  |
| 392 [188]     | 2009 | ...  | ... | ... | ... | 46    | F | cut    | Yes | Yes | No | No | 2   | Bactericidal | ... | Yes | No  | No | Y  | ...  |
| 393 [187]     | 2009 | ...  | ... | ... | ... | 56    | M | cut    | Yes | No  | No | No | 2   | Bactericidal | ... | No  | No  | No | N  | ...  |
| 394 [187]     | 2009 | ...  | ... | ... | ... | 59    | M | cut    | ... | No  | No | No | ... | Bactericidal | ... | No  | No  | No | N  | ...  |
| 395 [189]     | 2009 | ...  | ... | ... | ... | 59    | M | ingest | Yes | No  | No | No | 3+  | Both         | ... | No  | No  | No | 13 | 13   |
| 396 [190]     | 2010 | ...  | ... | ... | ... | 0.1   | M | cut    | Yes | No  | No | No | 1   | Bactericidal | ... | No  | No  | No | N  | 10   |
| 397 [190]     | 2010 | ...  | ... | ... | ... | 2     | M | cut    | ... | No  | No | No | 1   | Bactericidal | ... | Yes | No  | No | N  | 10   |
| 398 [190]     | 2010 | ...  | ... | ... | ... | 3     | M | cut    | ... | No  | No | No | 1   | Bactericidal | ... | No  | No  | No | N  | 10   |
| 399 [190]     | 2010 | ...  | ... | ... | ... | 3     | F | cut    | ... | No  | No | No | 1   | Bactericidal | ... | No  | No  | No | N  | 10   |
| 400 [190]     | 2010 | ...  | ... | ... | ... | 3     | F | cut    | ... | No  | No | No | 1   | Bactericidal | ... | Yes | No  | No | N  | 14   |
| 401 [190]     | 2010 | ...  | ... | ... | ... | 4     | M | cut    | ... | No  | No | No | 1   | Bactericidal | ... | Yes | No  | No | N  | 10   |
| 402 [190]     | 2010 | ...  | ... | ... | ... | 5     | M | cut    | ... | No  | No | No | 1   | Bactericidal | ... | Yes | No  | No | N  | 10   |
| 403 [190]     | 2010 | ...  | ... | ... | ... | 5     | M | cut    | ... | No  | No | No | 1   | Bactericidal | ... | No  | No  | No | N  | 10   |
| 404 [190]     | 2010 | ...  | ... | ... | ... | 5     | M | cut    | ... | No  | No | No | 1   | Bactericidal | ... | No  | No  | No | N  | 10   |
| 405 [190]     | 2010 | ...  | ... | ... | ... | 5     | F | cut    | ... | No  | No | No | 1   | Bactericidal | ... | Yes | No  | No | N  | 7    |
| 406 [190]     | 2010 | ...  | ... | ... | ... | 5     | F | cut    | ... | No  | No | No | 1   | Bactericidal | ... | No  | No  | No | N  | 3    |
| 407 [190]     | 2010 | ...  | ... | ... | ... | 5     | F | cut    | ... | No  | No | No | 1   | Bactericidal | ... | Yes | No  | No | N  | 10   |
| 408 [190]     | 2010 | ...  | ... | ... | ... | 6     | M | cut    | ... | No  | No | No | 1   | Bactericidal | ... | No  | No  | No | N  | 5    |
| 409 [190]     | 2010 | ...  | ... | ... | ... | 6     | M | cut    | ... | No  | No | No | 1   | Bactericidal | ... | Yes | No  | No | N  | 11   |

|               |      |      |     |     |     |    |   |        |     |    |    |    |     |              |     |     |    |    |   |     |
|---------------|------|------|-----|-----|-----|----|---|--------|-----|----|----|----|-----|--------------|-----|-----|----|----|---|-----|
| 410 [190]     | 2010 | ...  | ... | ... | ... | 6  | M | cut    | ... | No | No | No | 1   | Bactericidal | ... | No  | No | No | N | 10  |
| 411 [190]     | 2010 | ...  | ... | ... | ... | 6  | M | cut    | ... | No | No | No | 1   | Bactericidal | ... | No  | No | No | N | 10  |
| 412 [190]     | 2010 | ...  | ... | ... | ... | 6  | F | cut    | ... | No | No | No | 1   | Bactericidal | ... | Yes | No | No | N | 20  |
| 413 [190]     | 2010 | ...  | ... | ... | ... | 6  | F | cut    | ... | No | No | No | 1   | Bactericidal | ... | No  | No | No | N | 5   |
| 414 [190]     | 2010 | ...  | ... | ... | ... | 6  | F | cut    | ... | No | No | No | 1   | Bactericidal | ... | No  | No | No | N | 10  |
| 415 [190]     | 2010 | ...  | ... | ... | ... | 6  | F | cut    | ... | No | No | No | 1   | Bactericidal | ... | No  | No | No | N | 14  |
| 416 [190]     | 2010 | ...  | ... | ... | ... | 7  | M | cut    | ... | No | No | No | ... | Bactericidal | ... | No  | No | No | N | 8   |
| 417 [190]     | 2010 | ...  | ... | ... | ... | 7  | M | cut    | ... | No | No | No | ... | Bactericidal | ... | No  | No | No | N | 12  |
| 418 [190]     | 2010 | ...  | ... | ... | ... | 7  | M | cut    | ... | No | No | No | 1   | Bactericidal | ... | Yes | No | No | N | 7   |
| 419 [190]     | 2010 | ...  | ... | ... | ... | 7  | M | cut    | ... | No | No | No | 1   | Bactericidal | ... | No  | No | No | N | 7   |
| 420 [190]     | 2010 | ...  | ... | ... | ... | 7  | M | cut    | ... | No | No | No | 1   | Bactericidal | ... | No  | No | No | N | 7   |
| 421 [190]     | 2010 | ...  | ... | ... | ... | 7  | M | cut    | ... | No | No | No | 1   | Bactericidal | ... | No  | No | No | N | 10  |
| 422 [190]     | 2010 | ...  | ... | ... | ... | 8  | M | cut    | ... | No | No | No | 1   | Bactericidal | ... | Yes | No | No | N | 6   |
| 423 [190]     | 2010 | ...  | ... | ... | ... | 8  | M | cut    | ... | No | No | No | 1   | Bactericidal | ... | No  | No | No | N | 7   |
| 424 [190]     | 2010 | ...  | ... | ... | ... | 8  | M | cut    | ... | No | No | No | 1   | Bactericidal | ... | No  | No | No | N | 10  |
| 425 [190]     | 2010 | ...  | ... | ... | ... | 8  | M | cut    | ... | No | No | No | 1   | Bactericidal | ... | Yes | No | No | N | 10  |
| 426 [190]     | 2010 | ...  | ... | ... | ... | 8  | M | cut    | ... | No | No | No | 1   | Bactericidal | ... | No  | No | No | N | 3   |
| 427 [190,191] | 2010 | 2014 | ... | ... | ... | 8  | F | cut    | Yes | No | No | No | 2   | Both         | ... | Yes | No | No | N | 10  |
| 428 [190]     | 2010 | ...  | ... | ... | ... | 8  | F | cut    | ... | No | No | No | 1   | Bactericidal | ... | No  | No | No | N | 5   |
| 429 [190]     | 2010 | ...  | ... | ... | ... | 8  | F | cut    | ... | No | No | No | 1   | Bactericidal | ... | No  | No | No | N | 7   |
| 430 [190]     | 2010 | ...  | ... | ... | ... | 8  | F | cut    | ... | No | No | No | 1   | Bactericidal | ... | No  | No | No | N | 2   |
| 431 [190]     | 2010 | ...  | ... | ... | ... | 9  | M | cut    | ... | No | No | No | 1   | Bactericidal | ... | No  | No | No | N | 5   |
| 432 [190]     | 2010 | ...  | ... | ... | ... | 9  | M | cut    | ... | No | No | No | 1   | Bactericidal | ... | No  | No | No | N | 10  |
| 433 [190]     | 2010 | ...  | ... | ... | ... | 9  | M | cut    | ... | No | No | No | 1   | Bactericidal | ... | No  | No | No | N | 10  |
| 434 [190]     | 2010 | ...  | ... | ... | ... | 9  | F | cut    | ... | No | No | No | 1   | Bactericidal | ... | Yes | No | No | N | 14  |
| 435 [190]     | 2010 | ...  | ... | ... | ... | 10 | M | cut    | ... | No | No | No | 1   | Bactericidal | ... | Yes | No | No | N | 10  |
| 436 [190]     | 2010 | ...  | ... | ... | ... | 10 | F | cut    | ... | No | No | No | 1   | Bactericidal | ... | No  | No | No | N | 10  |
| 437 [190]     | 2010 | ...  | ... | ... | ... | 10 | F | cut    | ... | No | No | No | 1   | Bactericidal | ... | No  | No | No | N | 10  |
| 438 [190]     | 2010 | ...  | ... | ... | ... | 10 | F | cut    | ... | No | No | No | 1   | Bactericidal | ... | No  | No | No | N | 10  |
| 439 [190]     | 2010 | ...  | ... | ... | ... | 11 | F | cut    | ... | No | No | No | 1   | Bactericidal | ... | Yes | No | No | N | 5   |
| 440 [190]     | 2010 | ...  | ... | ... | ... | 11 | F | cut    | ... | No | No | No | 1   | Bactericidal | ... | Yes | No | No | N | 15  |
| 441 [190]     | 2010 | ...  | ... | ... | ... | 11 | F | cut    | ... | No | No | No | 1   | Bactericidal | ... | No  | No | No | N | 10  |
| 442 [190]     | 2010 | ...  | ... | ... | ... | 12 | M | cut    | ... | No | No | No | 1   | Bactericidal | ... | Yes | No | No | N | 6   |
| 443 [190]     | 2010 | ...  | ... | ... | ... | 12 | M | cut    | ... | No | No | No | 1   | Bactericidal | ... | No  | No | No | N | 7   |
| 444 [190]     | 2010 | ...  | ... | ... | ... | 12 | F | cut    | ... | No | No | No | ... | Bactericidal | ... | No  | No | No | N | 9   |
| 445 [190]     | 2010 | ...  | ... | ... | ... | 12 | F | cut    | ... | No | No | No | 1   | Bactericidal | ... | No  | No | No | N | 11  |
| 446 [190]     | 2010 | ...  | ... | ... | ... | 12 | F | cut    | ... | No | No | No | 1   | Bactericidal | ... | No  | No | No | N | 10  |
| 447 [190]     | 2010 | ...  | ... | ... | ... | 13 | M | cut    | ... | No | No | No | 1   | Bactericidal | ... | Yes | No | No | N | 7   |
| 448 [190]     | 2010 | ...  | ... | ... | ... | 13 | M | cut    | ... | No | No | No | 1   | Bactericidal | ... | Yes | No | No | N | 6   |
| 449 [192]     | 2010 | ...  | ... | ... | ... | 13 | F | ingest | Yes | No | No | No | 1   | Bactericidal | ... | No  | No | No | Y | 0.5 |
| 450 [190]     | 2010 | ...  | ... | ... | ... | 14 | M | cut    | ... | No | No | No | 1   | Bactericidal | ... | No  | No | No | N | 5   |
| 451 [190]     | 2010 | ...  | ... | ... | ... | 14 | M | cut    | ... | No | No | No | 1   | Bactericidal | ... | No  | No | No | N | 10  |
| 452 [190]     | 2010 | ...  | ... | ... | ... | 14 | F | cut    | ... | No | No | No | 1   | Bactericidal | ... | Yes | No | No | N | 13  |
| 453 [190]     | 2010 | ...  | ... | ... | ... | 14 | F | cut    | ... | No | No | No | 1   | Bactericidal | ... | No  | No | No | N | 5   |
| 454 [190]     | 2010 | ...  | ... | ... | ... | 15 | M | cut    | ... | No | No | No | 1   | Bactericidal | ... | No  | No | No | N | 10  |
| 455 [190]     | 2010 | ...  | ... | ... | ... | 15 | F | cut    | ... | No | No | No | 1   | Bactericidal | ... | No  | No | No | N | 7   |

|                   |      |      |      |     |     |    |   |        |                  |     |    |     |     |              |     |     |    |    |    |     |
|-------------------|------|------|------|-----|-----|----|---|--------|------------------|-----|----|-----|-----|--------------|-----|-----|----|----|----|-----|
| 456 [190]         | 2010 | ...  | ...  | ... | ... | 16 | M | cut    | ...              | No  | No | No  | 1   | Bactericidal | ... | No  | No | No | N  | 5   |
| 457 [190]         | 2010 | ...  | ...  | ... | ... | 16 | M | cut    | ...              | No  | No | No  | ... | Bactericidal | ... | No  | No | No | N  | 10  |
| 458 [190]         | 2010 | ...  | ...  | ... | ... | 17 | M | cut    | ...              | No  | No | No  | 1   | Bactericidal | ... | No  | No | No | N  | 10  |
| 459 [190]         | 2010 | ...  | ...  | ... | ... | 17 | M | cut    | ...              | No  | No | No  | 1   | Bactericidal | ... | No  | No | No | N  | 10  |
| 460 [190]         | 2010 | ...  | ...  | ... | ... | 17 | F | cut    | ...              | No  | No | No  | 1   | Bactericidal | ... | Yes | No | No | N  | 10  |
| 461 [190]         | 2010 | ...  | ...  | ... | ... | 18 | F | cut    | ...              | No  | No | No  | 1   | Bactericidal | ... | No  | No | No | N  | 8   |
| 462 [193]         | 2010 | ...  | ...  | ... | ... | 18 | F | cut    | ...              | No  | No | No  | 1   | Bactericidal | ... | No  | No | No | N  | ... |
| 463 [193]         | 2010 | ...  | ...  | ... | ... | 19 | M | cut    | Yes              | No  | No | No  | 1   | Bactericidal | ... | No  | No | No | N  | ... |
| 464 [193]         | 2010 | ...  | ...  | ... | ... | 21 | F | cut    | ...              | No  | No | No  | 1   | Bactericidal | ... | No  | No | No | N  | ... |
| 465 [193]         | 2010 | ...  | ...  | ... | ... | 23 | M | cut    | Yes              | No  | No | No  | 1   | Bactericidal | ... | No  | No | No | N  | ... |
| 466 [193]         | 2010 | ...  | ...  | ... | ... | 23 | M | cut    | ...              | No  | No | No  | 1   | Bactericidal | ... | No  | No | No | N  | ... |
| 467 [194]         | 2010 | ...  | ...  | ... | ... | 23 | M | inject | Yes              | No  | No | Yes | ... | ...          | ... | No  | No | No | N  | ... |
| 468 [193]         | 2010 | ...  | ...  | ... | ... | 24 | M | cut    | ...              | No  | No | No  | 1   | Bactericidal | ... | No  | No | No | N  | ... |
| 469 [195]         | 2010 | ...  | ...  | ... | ... | 24 | F | inhal  | Yes              | No  | No | No  | 2   | Bactericidal | 11  | Yes | No | No | N  | 61  |
| 470 [193]         | 2010 | ...  | ...  | ... | ... | 27 | M | cut    | Yes              | No  | No | No  | 1   | Bactericidal | ... | No  | No | No | N  | ... |
| 471 [193]         | 2010 | ...  | ...  | ... | ... | 28 | M | cut    | Yes              | No  | No | No  | 1   | Bactericidal | ... | No  | No | No | N  | ... |
| 472 [193,196]     | 2010 | 2012 | ...  | ... | ... | 30 | M | cut    | Yes              | No  | No | No  | 1   | Bactericidal | ... | No  | No | No | N  | 22  |
| 473 [193]         | 2010 | ...  | ...  | ... | ... | 30 | M | cut    | ...              | No  | No | No  | 1   | PSI          | ... | No  | No | No | N  | ... |
| 474 [193]         | 2010 | ...  | ...  | ... | ... | 30 | F | cut    | Yes              | No  | No | No  | 1   | Bactericidal | ... | No  | No | No | N  | ... |
| 475 [197]         | 2010 | ...  | ...  | ... | ... | 33 | M | inhal  | Yes              | Yes | No | No  | 1   | PSI          | ... | No  | No | No | 2  | 2   |
| 476 [193]         | 2010 | ...  | ...  | ... | ... | 33 | M | cut    | Yes              | No  | No | No  | ... | Both         | ... | No  | No | No | N  | ... |
| 477 [193]         | 2010 | ...  | ...  | ... | ... | 33 | M | cut    | Yes              | No  | No | No  | 1   | PSI          | ... | No  | No | No | N  | ... |
| 478 [193]         | 2010 | ...  | ...  | ... | ... | 33 | M | cut    | ...              | No  | No | No  | 1   | Bactericidal | ... | No  | No | No | N  | ... |
| 479 [193]         | 2010 | ...  | ...  | ... | ... | 35 | F | cut    | ...              | No  | No | No  | 1   | Bactericidal | ... | No  | No | No | N  | ... |
| 480 [198]         | 2010 | ...  | ...  | ... | ... | 39 | M | cut    | ...              | No  | No | No  | 1   | Bactericidal | ... | No  | No | No | N  | 10  |
| 481 [193]         | 2010 | ...  | ...  | ... | ... | 39 | M | cut    | ...              | No  | No | No  | 1   | Bactericidal | ... | No  | No | No | N  | ... |
| 482 [193]         | 2010 | ...  | ...  | ... | ... | 40 | M | cut    | Yes              | No  | No | No  | 1   | Bactericidal | ... | No  | No | No | N  | ... |
| 483 [199]         | 2010 | ...  | ...  | ... | ... | 42 | M | inject | Yes <sup>a</sup> | No  | No | No  | 1   | Bactericidal | ... | No  | No | No | 8  | 7.5 |
| 484 [200]         | 2010 | ...  | ...  | ... | ... | 43 | F | ingest | Yes              | No  | No | No  | 1   | Bactericidal | ... | No  | No | No | 20 | 20  |
| 485 [193,196]     | 2010 | 2012 | ...  | ... | ... | 44 | M | cut    | Yes              | No  | No | No  | 1   | Bactericidal | ... | No  | No | No | N  | ... |
| 486 [193]         | 2010 | ...  | ...  | ... | ... | 48 | M | cut    | Yes              | No  | No | No  | 1   | Bactericidal | ... | No  | No | No | N  | ... |
| 487 [193]         | 2010 | ...  | ...  | ... | ... | 52 | F | cut    | ...              | No  | No | No  | 1   | Bactericidal | ... | No  | No | No | N  | ... |
| 488 [193]         | 2010 | ...  | ...  | ... | ... | 55 | F | cut    | ...              | No  | No | No  | 1   | Bactericidal | ... | No  | No | No | N  | ... |
| 489 [193]         | 2010 | ...  | ...  | ... | ... | 64 | F | cut    | Yes              | No  | No | No  | ... | Bactericidal | ... | No  | No | No | N  | ... |
| 490 [192]         | 2010 | ...  | ...  | ... | ... | 67 | M | inhal  | Yes              | No  | No | No  | 1   | Bactericidal | ... | No  | No | No | 7  | 7   |
| 491 [201]         | 2011 | ...  | ...  | ... | ... | 17 | F | cut    | Yes              | No  | No | No  | 1   | Bactericidal | ... | No  | No | No | N  | ... |
| 492 [202,203,204] | 2011 | 2014 | 2017 | ... | ... | 24 | M | inject | Yes              | No  | No | No  | 1   | Bactericidal | 1   | Yes | No | No | 5  | 5   |
| 493 [203,204,205] | 2011 | 2014 | 2017 | ... | ... | 28 | F | inject | Yes              | No  | No | No  | 3+  | Both         | ... | No  | No | No | N  | 30  |
| 494 [206]         | 2011 | ...  | ...  | ... | ... | 32 | M | cut    | Yes              | No  | No | No  | 1   | Bactericidal | ... | No  | No | No | N  | ... |
| 495 [207]         | 2011 | ...  | ...  | ... | ... | 32 | M | inject | Yes              | No  | No | No  | 3+  | Both         | ... | No  | No | No | N  | ... |
| 496 [204,208]     | 2011 | 2017 | ...  | ... | ... | 32 | F | inject | ...              | No  | No | No  | 3+  | Both         | ... | No  | No | No | N  | 11  |
| 497 [208]         | 2011 | ...  | ...  | ... | ... | 36 | M | inject | ...              | No  | No | No  | 3+  | Both         | ... | No  | No | No | N  | ... |
| 498 [203,204,208] | 2011 | 2014 | 2017 | ... | ... | 44 | M | inject | ...              | No  | No | No  | ... | ...          | 5   | No  | No | No | N  | 60  |
| 499 [209]         | 2011 | ...  | ...  | ... | ... | 45 | M | cut    | Yes              | Yes | No | Yes | ... | ...          | ... | No  | No | No | Y  | ... |
| 500 [210]         | 2011 | ...  | ...  | ... | ... | 53 | F | inject | Yes              | No  | No | Yes | ... | ...          | ... | No  | No | No | 61 | 61  |
| 501 [211]         | 2011 | ...  | ...  | ... | ... | 61 | M | inhal  | Yes              | No  | No | No  | 1   | PSI          | 5   | No  | No | No | N  | 23  |

|                   |                |     |     |     |     |    |   |        |     |     |     |     |     |              |     |     |    |    |    |     |
|-------------------|----------------|-----|-----|-----|-----|----|---|--------|-----|-----|-----|-----|-----|--------------|-----|-----|----|----|----|-----|
| 502 [212]         | 2012           | ... | ... | ... | ... | 38 | M | cut    | ... | No  | No  | No  | 1   | Bactericidal | ... | No  | No | No | N  | ... |
| 503 [213]         | 2012           | ... | ... | ... | ... | 42 | F | ingest | Yes | No  | No  | No  | 2   | Bactericidal | ... | Yes | No | No | 17 | 17  |
| 504 [214]         | 2012           | ... | ... | ... | ... | 60 | M | cut    | Yes | No  | No  | No  | 1   | Bactericidal | ... | No  | No | No | N  | 10  |
| 505 [215]         | 2012           | ... | ... | ... | ... | 66 | M | inhal  | Yes | No  | No  | No  | ... | Both         | Y   | No  | No | No | N  | 22  |
| 506 [216]         | 2013           | ... | ... | ... | ... | 17 | M | ingest | Yes | No  | No  | Yes | ... | ...          | ... | No  | No | No | N  | 5   |
| 507 [216]         | 2013           | ... | ... | ... | ... | 17 | M | ingest | Yes | No  | No  | Yes | ... | ...          | ... | No  | No | No | N  | 5   |
| 508 [217]         | 2013           | ... | ... | ... | ... | 25 | M | cut    | Yes | No  | Yes | No  | 1   | Bactericidal | ... | No  | No | No | N  | ... |
| 509 [216]         | 2013           | ... | ... | ... | ... | 25 | M | ingest | Yes | No  | No  | Yes | ... | ...          | ... | No  | No | No | N  | 8   |
| 510 [216]         | 2013           | ... | ... | ... | ... | 26 | F | ingest | Yes | No  | No  | No  | 1   | Bactericidal | ... | No  | No | No | N  | 10  |
| 511 [218]         | 2013           | ... | ... | ... | ... | 29 | M | inject | Yes | No  | No  | No  | 3+  | Both         | ... | No  | No | No | Y  | 1   |
| 512 [217]         | 2013           | ... | ... | ... | ... | 29 | M | cut    | ... | No  | No  | No  | 1   | Bactericidal | ... | No  | No | No | N  | ... |
| 513 [217]         | 2013           | ... | ... | ... | ... | 45 | M | cut    | ... | No  | No  | No  | 2   | Both         | ... | No  | No | No | N  | ... |
| 514 [219]         | 2013           | ... | ... | ... | ... | 55 | M | inject | Yes | No  | No  | No  | 3+  | Both         | ... | Yes | No | No | Y  | 4   |
| 515 [191]         | 2014           | ... | ... | ... | ... | 2  | M | cut    | ... | No  | No  | No  | 2   | Both         | ... | No  | No | No | N  | ... |
| 516 [203,204]     | 2014 2017      | ... | ... | ... | ... | 19 | F | inject | Yes | No  | No  | No  | 3+  | Both         | ... | No  | No | No | N  | 7   |
| 517 [203,204]     | 2014 2017      | ... | ... | ... | ... | 20 | F | inject | Yes | Yes | No  | No  | 3+  | Both         | ... | No  | No | No | N  | 8   |
| 518 [203,204]     | 2014 2017      | ... | ... | ... | ... | 26 | F | inject | Yes | Yes | No  | No  | 1   | Bactericidal | ... | No  | No | No | 2  | 2   |
| 519 [203,204]     | 2014 2017      | ... | ... | ... | ... | 27 | M | inject | Yes | No  | No  | No  | 3+  | Both         | ... | No  | No | No | N  | 1   |
| 520 [203,204]     | 2014 2017      | ... | ... | ... | ... | 27 | M | inject | Yes | No  | No  | No  | 1   | Bactericidal | ... | No  | No | No | N  | 1   |
| 521 [203,204]     | 2014 2017      | ... | ... | ... | ... | 27 | F | inject | Yes | No  | No  | No  | 3+  | Both         | 1   | No  | No | No | N  | 42  |
| 522 [203,204]     | 2014 2017      | ... | ... | ... | ... | 29 | M | inject | Yes | No  | No  | No  | 3+  | Both         | ... | No  | No | No | N  | 11  |
| 523 [203,204]     | 2014 2017      | ... | ... | ... | ... | 29 | F | inject | Yes | No  | No  | No  | 3+  | Both         | ... | No  | No | No | N  | 14  |
| 524 [220]         | 2014           | ... | ... | ... | ... | 30 | M | inject | Yes | No  | No  | No  | 3+  | Both         | 1   | No  | No | No | N  | ... |
| 525 [203,204]     | 2014 2017      | ... | ... | ... | ... | 30 | F | inject | Yes | No  | No  | No  | ... | Both         | ... | No  | No | No | N  | 2   |
| 526 [203,204]     | 2014 2017      | ... | ... | ... | ... | 32 | M | inject | Yes | No  | No  | No  | 3+  | Both         | ... | No  | No | No | N  | 29  |
| 527 [203,204]     | 2014 2017      | ... | ... | ... | ... | 35 | M | inject | Yes | No  | No  | No  | 3+  | Both         | 3   | Yes | No | No | 6  | 6   |
| 528 [203,204]     | 2014 2017      | ... | ... | ... | ... | 35 | F | inject | Yes | No  | No  | No  | 3+  | Both         | 1   | Yes | No | No | 4  | 4   |
| 529 [203,204]     | 2014 2017      | ... | ... | ... | ... | 36 | M | inject | Yes | No  | No  | No  | 3+  | Both         | 1   | No  | No | No | N  | 2   |
| 530 [221]         | 2014           | ... | ... | ... | ... | 37 | M | inject | Yes | No  | No  | No  | 1   | PSI          | ... | No  | No | No | N  | ... |
| 531 [203,204]     | 2014 2017      | ... | ... | ... | ... | 37 | M | inject | Yes | No  | No  | No  | 1   | PSI          | ... | No  | No | No | 7  | 7   |
| 532 [203,204]     | 2014 2017      | ... | ... | ... | ... | 38 | F | inject | Yes | No  | No  | No  | 3+  | Both         | 2   | No  | No | No | N  | 68  |
| 533 [203,204]     | 2014 2017      | ... | ... | ... | ... | 40 | M | inject | Yes | Yes | No  | No  | 3+  | Both         | 1   | Yes | No | No | 3  | 3   |
| 534 [203,204,222] | 2014 2017      | ... | ... | ... | ... | 40 | M | inject | Yes | No  | No  | No  | 1   | Bactericidal | 3   | No  | No | No | N  | 29  |
| 535 [203,204]     | 2014 2015 2017 | ... | ... | ... | ... | 41 | M | inject | Yes | Yes | No  | No  | 3+  | Both         | ... | No  | No | No | 2  | 2   |
| 536 [203,204]     | 2014 2017      | ... | ... | ... | ... | 41 | M | inject | Yes | No  | No  | No  | 2   | Both         | 3   | No  | No | No | N  | 90  |
| 537 [220]         | 2014           | ... | ... | ... | ... | 43 | F | inject | Yes | No  | No  | No  | 2   | Both         | ... | No  | No | No | 50 | 50  |
| 538 [203,204]     | 2014 2017      | ... | ... | ... | ... | 44 | M | inject | Yes | No  | No  | No  | 3+  | Both         | 1   | No  | No | No | 3  | 3   |
| 539 [203,204]     | 2014 2017      | ... | ... | ... | ... | 44 | M | inject | Yes | No  | No  | No  | ... | Both         | 3   | No  | No | No | N  | 31  |
| 540 [223]         | 2014           | ... | ... | ... | ... | 45 | M | cut    | Yes | No  | No  | No  | 2   | Bactericidal | ... | No  | No | No | N  | 28  |
| 541 [191]         | 2014           | ... | ... | ... | ... | 58 | M | cut    | Yes | No  | No  | No  | 2   | Both         | ... | No  | No | No | N  | ... |
| 542 [220]         | 2014           | ... | ... | ... | ... | 60 | M | inject | Yes | No  | No  | No  | 3+  | Both         | ... | No  | No | No | N  | ... |
| 543 [224]         | 2015           | ... | ... | ... | ... | 19 | M | cut    | Yes | No  | No  | No  | 1   | Bactericidal | ... | No  | No | No | N  | ... |
| 544 [204,225]     | 2015 2017      | ... | ... | ... | ... | 28 | F | inject | ... | No  | No  | No  | 3+  | Both         | ... | No  | No | No | N  | 4   |
| 545 [226]         | 2015           | ... | ... | ... | ... | 34 | M | cut    | Yes | No  | No  | No  | 2   | Bactericidal | ... | No  | No | No | N  | ... |
| 546 [204,225]     | 2015 2017      | ... | ... | ... | ... | 37 | F | inject | Yes | No  | No  | No  | 1   | Bactericidal | ... | No  | No | No | N  | 1   |
| 547 [204,225]     | 2015 2017      | ... | ... | ... | ... | 39 | F | inject | ... | No  | No  | No  | 1   | Bactericidal | ... | No  | No | No | N  | 2   |

|           |      |     |     |     |     |    |   |        |                  |     |     |     |     |              |     |    |    |    |   |     |
|-----------|------|-----|-----|-----|-----|----|---|--------|------------------|-----|-----|-----|-----|--------------|-----|----|----|----|---|-----|
| 548 [227] | 2015 | ... | ... | ... | ... | 50 | M | cut    | ...              | No  | Yes | No  | 1   | Bactericidal | ... | No | No | No | N | ... |
| 549 [228] | 2015 | ... | ... | ... | ... | 53 | M | cut    | Yes <sup>a</sup> | No  | No  | Yes | ... | ...          | ... | No | No | No | 4 | 4   |
| 550 [229] | 2015 | ... | ... | ... | ... | 55 | M | cut    | Yes              | Yes | No  | Yes | ... | ...          | ... | No | No | No | 2 | 2   |
| 551 [230] | 2015 | ... | ... | ... | ... | 59 | F | cut    | Yes              | Yes | No  | No  | 2   | Bactericidal | ... | No | No | No | 6 | 6   |
| 552 [225] | 2015 | ... | ... | ... | ... | NR |   | inject | ...              | No  | No  | Yes | ... | ...          | ... | No | No | No | N | ... |
| 553 [225] | 2015 | ... | ... | ... | ... | NR |   | inject | ...              | No  | No  | Yes | ... | ...          | ... | No | No | No | N | ... |
| 554 [225] | 2015 | ... | ... | ... | ... | NR |   | inject | ...              | No  | No  | Yes | ... | ...          | ... | No | No | No | N | ... |
| 555 [225] | 2015 | ... | ... | ... | ... | NR |   | inject | ...              | No  | No  | Yes | ... | ...          | ... | No | No | No | N | ... |
| 556 [225] | 2015 | ... | ... | ... | ... | NR |   | inject | ...              | No  | No  | Yes | ... | ...          | ... | No | No | No | N | ... |
| 557 [225] | 2015 | ... | ... | ... | ... | NR |   | inject | ...              | No  | No  | Yes | ... | ...          | ... | No | No | No | N | ... |
| 558 [225] | 2015 | ... | ... | ... | ... | NR |   | inject | ...              | No  | No  | Yes | ... | ...          | ... | No | No | No | N | ... |
| 559 [225] | 2015 | ... | ... | ... | ... | NR |   | inject | ...              | No  | No  | Yes | ... | ...          | ... | No | No | No | N | ... |
| 560 [225] | 2015 | ... | ... | ... | ... | NR |   | inject | ...              | No  | No  | Yes | ... | ...          | ... | No | No | No | N | ... |
| 561 [225] | 2015 | ... | ... | ... | ... | NR |   | inject | ...              | No  | No  | Yes | ... | ...          | ... | No | No | No | N | ... |
| 562 [225] | 2015 | ... | ... | ... | ... | NR |   | inject | ...              | No  | No  | Yes | ... | ...          | ... | No | No | No | N | ... |
| 563 [225] | 2015 | ... | ... | ... | ... | NR |   | inject | ...              | No  | No  | Yes | ... | ...          | ... | No | No | No | N | ... |
| 564 [225] | 2015 | ... | ... | ... | ... | NR |   | inject | ...              | No  | No  | No  | 3+  | Both         | ... | No | No | No | N | ... |
| 565 [225] | 2015 | ... | ... | ... | ... | NR |   | inject | ...              | No  | No  | No  | 1   | PSI          | ... | No | No | No | N | ... |
| 566 [225] | 2015 | ... | ... | ... | ... | NR |   | inject | ...              | No  | No  | Yes | ... | ...          | ... | No | No | No | N | ... |
| 567 [225] | 2015 | ... | ... | ... | ... | NR |   | inject | ...              | No  | No  | Yes | ... | ...          | ... | No | No | No | N | ... |
| 568 [225] | 2015 | ... | ... | ... | ... | NR |   | inject | ...              | No  | No  | Yes | ... | ...          | ... | No | No | No | N | ... |
| 569 [225] | 2015 | ... | ... | ... | ... | NR |   | inject | ...              | No  | No  | Yes | ... | ...          | ... | No | No | No | N | ... |
| 570 [231] | 2016 | ... | ... | ... | ... | 10 | F | cut    | Yes              | Yes | No  | Yes | ... | ...          | ... | No | No | No | Y | ... |
| 571 [231] | 2016 | ... | ... | ... | ... | 13 | M | cut    | Yes              | No  | No  | No  | 1   | Bactericidal | ... | No | No | No | N | 5   |
| 572 [231] | 2016 | ... | ... | ... | ... | 13 | F | cut    | Yes <sup>a</sup> | No  | No  | Yes | ... | ...          | ... | No | No | No | Y | ... |
| 573 [231] | 2016 | ... | ... | ... | ... | 14 | M | cut    | Yes              | Yes | No  | Yes | ... | ...          | ... | No | No | No | Y | ... |
| 574 [232] | 2016 | ... | ... | ... | ... | 30 | M | cut    | ...              | No  | No  | No  | 2   | Both         | ... | No | No | No | N | 5   |
| 575 [233] | 2016 | ... | ... | ... | ... | 32 | F | cut    | Yes              | No  | No  | No  | 1   | Bactericidal | ... | No | No | No | N | 12  |
| 576 [231] | 2016 | ... | ... | ... | ... | 35 | M | cut    | Yes              | Yes | No  | Yes | ... | ...          | ... | No | No | No | Y | ... |
| 577 [234] | 2016 | ... | ... | ... | ... | 41 | M | cut    | ...              | No  | No  | No  | 2   | Both         | ... | No | No | No | N | ... |
| 578 [231] | 2016 | ... | ... | ... | ... | 45 | M | cut    | Yes <sup>a</sup> | No  | No  | Yes | ... | ...          | ... | No | No | No | Y | ... |
| 579 [231] | 2016 | ... | ... | ... | ... | 50 | M | cut    | Yes <sup>a</sup> | No  | No  | Yes | ... | ...          | ... | No | No | No | Y | ... |
| 580 [232] | 2016 | ... | ... | ... | ... | 54 | M | cut    | Yes              | No  | No  | No  | 2   | Bactericidal | ... | No | No | No | N | 12  |
| 581 [235] | 2016 | ... | ... | ... | ... | 65 | M | inhal  | Yes              | No  | No  | No  | 1   | PSI          | ... | No | No | No | 7 | 7   |
| 582 [232] | 2016 | ... | ... | ... | ... | 77 | F | cut    | Yes              | No  | No  | No  | 1   | Bactericidal | ... | No | No | No | N | 14  |
| 583 [234] | 2016 | ... | ... | ... | ... | NR | M | cut    | ...              | No  | No  | No  | 2   | Both         | ... | No | No | No | N | ... |
| 584 [204] | 2017 | ... | ... | ... | ... | 28 | M | inject | Yes              | No  | No  | No  | ... | Both         | ... | No | No | No | N | 16  |
| 585 [204] | 2017 | ... | ... | ... | ... | 31 | M | inject | Yes              | No  | No  | No  | 3+  | Both         | ... | No | No | No | N | 4   |
| 586 [204] | 2017 | ... | ... | ... | ... | 31 | M | inject | Yes              | No  | No  | No  | 3+  | Both         | 1   | No | No | No | N | 38  |
| 587 [236] | 2017 | ... | ... | ... | ... | 35 | M | cut    | Yes              | No  | No  | No  | 1   | Bactericidal | ... | No | No | No | N | 5   |
| 588 [204] | 2017 | ... | ... | ... | ... | 37 | M | inject | Yes              | No  | No  | No  | 3+  | Both         | ... | No | No | No | N | 30  |
| 589 [204] | 2017 | ... | ... | ... | ... | 37 | M | inject | ...              | No  | No  | No  | 3+  | Both         | ... | No | No | No | N | 1   |
| 590 [204] | 2017 | ... | ... | ... | ... | 38 | M | inject | Yes              | No  | No  | No  | 3+  | Both         | ... | No | No | No | N | 17  |
| 591 [204] | 2017 | ... | ... | ... | ... | 40 | M | inject | Yes              | No  | No  | No  | ... | Both         | ... | No | No | No | N | 17  |
| 592 [204] | 2017 | ... | ... | ... | ... | 40 | F | inject | Yes              | No  | No  | No  | 3+  | Both         | 3   | No | No | No | N | 38  |
| 593 [204] | 2017 | ... | ... | ... | ... | 41 | M | inject | ...              | No  | No  | No  | 3+  | Both         | ... | No | No | No | N | 6   |

|           |      |     |     |     |     |    |   |        |     |     |    |     |     |     |              |     |     |    |    |   |     |
|-----------|------|-----|-----|-----|-----|----|---|--------|-----|-----|----|-----|-----|-----|--------------|-----|-----|----|----|---|-----|
| 594 [204] | 2017 | ... | ... | ... | ... | 42 | F | inject | Yes | No  | No | No  | No  | 2   | Both         | ... | No  | No | No | N | 45  |
| 595 [237] | 2017 | ... | ... | ... | ... | 43 | M | cut    | Yes | No  | No | No  | No  | 2   | Bactericidal | ... | Yes | No | No | N | ... |
| 596 [238] | 2017 | ... | ... | ... | ... | 43 | M | ...    | Yes | Yes | No | No  | No  | 2   | Bactericidal | ... | No  | No | No | 2 | 2   |
| 597 [204] | 2017 | ... | ... | ... | ... | 43 | M | inject | Yes | No  | No | No  | No  | 3+  | Both         | 1   | No  | No | No | N | 31  |
| 598 [204] | 2017 | ... | ... | ... | ... | 44 | M | inject | Yes | No  | No | No  | No  | 3+  | Both         | ... | No  | No | No | N | 35  |
| 599 [239] | 2018 | ... | ... | ... | ... | 34 | M | cut    | ... | No  | No | No  | No  | 2   | Bactericidal | ... | Yes | No | No | N | ... |
| 600 [240] | 2018 | ... | ... | ... | ... | 35 | F | cut    | ... | No  | No | No  | No  | 1   | PSI          | ... | No  | No | No | N | ... |
| 601 [241] | 2018 | ... | ... | ... | ... | 36 | F | cut    | Yes | No  | No | Yes | ... | ... | ...          | No  | No  | No | 2  | 2 |     |
| 602 [240] | 2018 | ... | ... | ... | ... | 36 | F | ingest | Yes | No  | No | No  | No  | 2   | Bactericidal | ... | No  | No | No | Y | ... |
| 603 [240] | 2018 | ... | ... | ... | ... | 40 | F | cut    | ... | No  | No | No  | No  | 1   | PSI          | ... | No  | No | No | N | ... |
| 604 [239] | 2018 | ... | ... | ... | ... | 47 | M | cut    | ... | No  | No | No  | No  | 2   | Bactericidal | ... | Yes | No | No | N | 31  |
| 605 [242] | 2018 | ... | ... | ... | ... | 48 | M | ...    | Yes | Yes | No | No  | No  | 3+  | Both         | ... | No  | No | No | Y | ... |

Abbreviations: cut, cutaneous; F, female; ingest, ingestion; inhal, inhalation; inject, injection; M, male; N, No; NP, nasopharyngeal; PSI, protein synthesis inhibitor.

<sup>a</sup> Patients who died are classified as systemic. Footnotes on individual patients indicate that death was the only qualification for being defined “systemic.”

<sup>b</sup> Pretreatment is defined as receiving an anthrax-appropriate antimicrobial prior to hospitalization.

<sup>c</sup> “No treatment” refers to patients who received no anthrax-appropriate antimicrobial or antitoxin/antiserum prior to or throughout hospitalization.

<sup>d</sup> Number of antimicrobial classes and categorization as bactericidal antimicrobial(s) alone, PSI(s) alone, or both bactericidal antimicrobial(s) and PSI(s) are based on treatment received in the first 2 days of hospitalization.

<sup>e</sup> Unit of measure is hospital days. When the values were positive but timing information was missing, values were recorded as Y.

### Line list references:

- Bell JH. On “wool sorter’s disease.” *Lancet* **1880**; 115(2963):909-11.
- Greenfield WS. Further investigations on anthrax and allied diseases in man and animals. *Lancet* **1880**; 116(2990):965...6.
- Davies-Colley N. Anthrax of face. *Transactions of the Pathological Society of London* **1883**; 34:291-3.
- Lucas RC. A fatal case of anthrax involving the brain. *British Medical Journal* **1893**; 1:350.
- Krzyszowski J. Several words about the pathological anatomy of anthrax [in Polish]. *Przegl Lek* **1901**; 40:556-7.
- Knaggs RL. A case of multiple malignant pustules (anthrax). *British Medical Journal* **1901**; 2(2116):135.
- Bell JH. On edematous and erysipelatous anthrax. *British Medical Journal* **1901**; 2(2116):133-5.
- Sturdy JC. A case of anthrax with extensive meningeal haemorrhage. *British Medical Journal* **1901**; 2(2116):135-6.
- Kreissel B. Zur casuistik des lungenmilzbrandes. *Wien Klin Wochenschr* **1901**; 42:1027-8.
- Moltrecht. Biologische abtheilung des arztlichen vereins hamburg. *Münchener Medizinische Wochenschrift* **1902**; 49:817-8.
- Bandi I. Contribution to the sero-therapeutic treatment of anthrax: two cases of general anthrax infection in man cured with anti-anthrax serum. *Lancet* **1904**; 164(4223):372-4.
- Legge T. The Milroy Lectures on Industrial Anthrax. *Lancet* **1905**; 165(4255):689-96.
- Lockwood CB, Andrewes FW. A Case of cutaneous anthrax successfully treated by Sclavo’s serum *British Medical Journal*. **1905**; 1(2297):16.
- Stretton JL. Kidderminster infirmary and children’s hospital: a case of anthrax successfully treated with Sclavo’s Serum. *Lancet* **1905**; 165(4265): 1420-1.
- Teacher JH. A case of human anthrax septicemia: infection through the intestine: diffuse meningeal hemorrhage. *Scott Med J* **1905**; 64:127-31.
- Teacher JH. A case of primary intestinal anthrax in man. *Lancet* **1906**; 168(4334):830.
- A case of anthrax at Exeter. *Lancet* **1906**; 168(4332):665.

18. Symmers WSC, Wilson WJ. On three cases of cerebro-spinal meningitis, associated respectively with *Bacillus anthracis*, *Bacillus typhosus*, and *Bacillus enteritidis*. The Journal of Pathology and Bacteriology **1909**; 13(1):251-5.
19. Parsons JG. Abscess of the nasal septum, probably due to anthrax infection. JAMA **1908**; 51(20):1697.
20. Herley R. Eight cases of external anthrax. Lancet **1909**; 174(4501):1662-5.
21. Solovbeva Z. [Epidemic pulmonary anthrax in North Serene, Kameshen - Skago Administrative Unit]. Vrachebno-sanitarnaia khronika Saratovskoi gubernii **1909**; (1):5-20.
22. Beyer. Uber Zwei falle von milzbrand. Münchener Medizinische Wochenschrift **1910**; 385.
23. Mitchell W. Anthrax and fatalism. British Medical Journal **1911**; 1(2622):751-2.
24. Jones HW. Landry's paralysis with report of a case. Medical Record **1913**; 84(8):335-7.
25. Reece RJ. Anthrax: simulating cerebrospinal fever. Lancet **1917**; 189(4881):406-10.
26. Harrington TF. Anthrax as an occupational disease in Massachusetts. N Engl J Med **1917**; 177(25):867-70.
27. Kronberger H. Ein Fall von Lungenmilzbrand mit Gungstigem Ausgang. Beitrage zur Klinik der Tuberkulose und Spezifischen Tuberkulose-Forschung **1917**; 38:135-44.
28. Andrews J. Anthrax as an Occupational Disease. Monthly Review of the U.S. Bureau of Labor Statistics **1920**; (267):58-98.
29. Bissell JB. Human anthrax: report of a typical case. New York Medical Journal, **1917**: 110.
30. Spearman B. Anthrax in Uganda. British Medical Journal **1917**; 1(2946):809.
31. Graham RR, Detweiler HK. Anthrax: A case of *B. anthracis* septicemia with recovery. JAMA **1918**; 70(10): 671.
32. Schwartz N. Diagnosis and treatment of anthrax. New York Medical Journal **1918**; 1171-4.
33. Gilmour CH, Campbell AR. Anthrax in man with a report of two cases. CMAJ **1918**; 8(2):97-107.
34. Regan JC. The local use of anti-anthrax serum in treatment of anthrax. JAMA **1919**; 72(24): 1724.
35. Dennett CG. Anthrax at Camp Dodge, Iowa: report of three cases, with bacteriologic and blood studies. JAMA **1919**; 72(4):270.
36. Amory OT. Anthrax at Embarkation Hospital, Newport News, VA. JAMA **1919**; 72(4):269.
37. Hubbard SD, William J. Investigation of thirty-four cases of human anthrax occurring in New York City in 1919 and 1920. Monthly Bulletin of the Department of Health, City of New York **1919**; 10(11):249-66.
38. Santee HE. Anthrax and its treatment. Ann Surg **1923**; 78(3):326-31.
39. Carey HW. Anthrax from the shaving brush and primary anthrax meningitis. Am J Med Sci **1920**; 159:742-6.
40. McCurrich M. A case of malignant pustule in which the incubation period was known. British Medical Journal **1920**; 1(3103):828.
41. Brooksher WR. Pulmonary anthrax: report of a case. JAMA **1920**; 74(5):323.
42. Mitchell GF. Meningeal anthrax. British Medical Journal **1921**; 2(3169):508.
43. Symmers D. The serum treatment of anthrax septicaemia. Ann Surg **1922**; 75(6):663-7.
44. McGlannan A. The treatment of anthrax infections. Ann Surg **1923**; 77(3):263-6.
45. Bell HH. Pulmonary anthrax, with report of a case. Mo Med **1924**; 21(1):407-9.
46. Krauss F, Spikes NO. Edematous anthrax of the face resulting in meningitis. Am J Ophthalmol **1926**; 9(5):337-9.
47. Canright CM. Human anthrax and its treatment. A report of three cases. Chin Med J **1928**; 42:479-96.
48. Coues. An acute infection with bloody fluid in the right pleural sac. N Engl J Med **1928**; 198(3):148-50.
49. Ellis D. A case of anthrax with malignant pustule and fatal hemorrhagic meningitis. Guy's Hospital Reports **1928**; 78: 464-65.
50. Coues. An inflammatory localized lesion on the face with marked edema. N Engl J Med **1928**; 198(3):150-3.
51. Hodgson AE. Anthrax in a 15 months old baby. British Medical Journal **1929**; 2(3588):667.
52. McKitterick JC. Pneumonic anthrax in a child. American Journal of Diseases in Children **1929**; 38(6):1252.
53. Schereffetin O. Zur milzbrandbehandlung. Wien Klin Wochenschr **1931**; 34:1083-4.

54. Husain N. Anthrax Pustule of the Neck. *Indian Medical Gazette* **1932**; 67(9):517.
55. McCowen G, Parker H. A case of anthrax meningitis. *Journal of the Royal Naval Medical Service* **1932**; 18:278-80.
56. Lucchesi P. Serum treatment of 19 cases of anthrax including one of external, internal and bacteremic type. *Am J Med Sci* **1932**; 183:795.
57. Dunscombe WK. Meningitis due to *B. anthracis*. *British Medical Journal* **1932**; 1(3708):190.
58. Gilbert FW. Human anthrax in Barotseland treated with novarsenobenzene. *Lancet* **1935**; 226(5858):1283-5.
59. Pawan J. A case of anthrax in Trinidad due to an infected shaving brush. *Am J Trop Med Hyg* **1935**:170.
60. Stewart HH. A Case of Anthrax Meningitis. *Ulster Med J* **1939**; 8(4):252-3.
61. Bonnar W. Sulfapyridine in human anthrax. *British Medical Journal* **1940**; 1:389.
62. Davidson IM. Cutaneous anthrax treated by arsenicals and sulphapyridine. *British Medical Journal* **1941**; 2(4220):725-6.
63. Gold H. Anthrax: A review of sixty cases, with a report on the therapeutic use of sulfonamide compounds. *JAMA Intern Med* **1942**; 70(5):785.
64. Krauss F. Anthrax appearing primarily in the nose. *JAMA Otolaryngol Head Neck Surg* **1943**; 37(2):238-41.
65. Ker W. Clinical notes. *East African Medical Journal* **1944**; 21:93-6.
66. Murphy FD. Treatment of human anthrax with penicillin: report of three cases. *JAMA* **1944**; 126(15):948.
67. Paul DK. Two cases of anthrax treated with sulphanilamide. *Indian Medical Gazette* **1945**; 80(3):154.
68. Perl AF. Anthrax: Its Incidence and Therapy: (With the Report of a Case). *CAMJ* **1945**; 52(6):592-600.
69. Ahmad S. Treatment of human anthrax with penicillin. *Indian Medical Gazette* **1945**; 80:623.
70. Stott H. Treatment of Human Cutaneous Anthrax with Penicillin. *British Medical Journal* **1945**; 2(4412):120.
71. Abrahams AM. Cutaneous anthrax treated with penicillin. *British Medical Journal* **1945**; 1(4404):771.
72. Mann GN. Penicillin in the treatment of human anthrax. *BMJ Mil Health* **1947**; 89(2):79-81.
73. Ez-Zahawi S. A case of primary human intestinal anthrax infection. *The Journal of the Palestine Arab Medical Association* **1947**; 2(2):36-7.
74. Shanahan RH, Griffin JR, Von Auersperg AP. Anthrax meningitis; report of a case of internal anthrax with recovery. *Am J Clin Pathol* **1947**; 17(9):719-22.
75. Griffin JR, Shanahan RH, Deangelis CE. Treatment of cutaneous anthrax with penicillin. *New York State Journal of Medicine* **1948**; 48(15):1718-21.
76. Riebeling M. Roentgen treatment of external infections due to *Bacillus anthracis*. *Radiology* **1948**; 51(3):333-40.
77. Reilly WA. Antibiotic therapy for cutaneous anthrax: Report of five cases. *JAMA Intern Med* **1948**; 82(6):529.
78. Ling C-C, Chen Y-S. *Bacillus anthracis* meningitis: Report of two cases. *Chin Med J* **1948**; 66:431-4.
79. Weinstein L, Oliver CS. The treatment of human anthrax with penicillin. *American Practitioner and Digest of Treatment* **1948**; 2(8):533-8.
80. Holgate JA, Holman RA. Diagnosis and treatment of cutaneous anthrax. *British Medical Journal* **1949**; 2(4627):575-9.
81. Corpus MJ, Quirino C. Cases of anthrax caused by ingestion of suspected carabao meat. *Journal of the Philippine Medical* **1949**; 25(10):503-8.
82. Gold H. Aureomycin in the treatment of anthrax. *Am J Med* **1950**; 8(1):31-3.
83. Gold H, Boger WP. Newer antibiotics in the treatment of anthrax. *N Engl J Med* **1951**; 244(11): 391-4.
84. Gold H. The Treatment of Anthrax. In: *Proceedings of the Symposium on Anthrax in Man*. Philadelphia: University of Pennsylvania, 1954:145-7;156-9.
85. Clarke PS. Chloramphenicol in treatment of cutaneous anthrax. *British Medical Journal* **1952**; 1(4749):86-7.
86. Haight TH. Anthrax meningitis: review of literature and report of two cases with autopsies. *Am J Med Sci* **1952**; 224(1):57-69.
87. Krug ES, Glenn HR. Case report of anthrax acquired in a college research laboratory. *Lancet* **1953**; 73(12):506-8.
88. Wright FJ, Ochieng EC. A case of anthrax septicaemia resembling bubonic plague. *East African Medical Journal* **1954**; 31(11):516.
89. Gold H. Anthrax; a report of one hundred seventeen cases. *JAMA Intern Med* **1955**; 96(3):387-96.
90. Jamieson WM, Green DM. Anthrax and bone-meal fertiliser. *Lancet* **1955**; 268(6863):560.
91. Ingram DG, Barnum DA. A case of anthrax in man contracted from a cow in Ontario. *Can J Public Health* **1956**; 47(8):343-6.
92. Ma HT, Ho TH. Treatment of cutaneous anthrax with penicillin and sulfadiazine. *Chin Med J* **1957**; 75(4):316-23.
93. Ruiz Sanchez F, Ruiz Sanchez A. Kanamycin in anthrax, typhoid paratyphoid, and brucellosis. *Ann N Y Acad Sci* **1958**; 76(2):235-41.

94. Vita A, Secu A, Cuciureanu G, Leibovici M, Bejenariu C, Cutu G. Considerations on 3 cases of meningo-encephalitis due to anthrax bacilli. *Rumanian Medical Review* **1961**; 5:36-9.
95. Plotkin SA, Brachman PS, Utell M, Bumford FH, Atchison MM. An epidemic of inhalation anthrax, the first in the twentieth century: I. Clinical features. *Am J Med* **2002**; 112(1):4-12.
96. Albrink WS, Brooks SM, Biron RE, Kopel M. Human inhalation anthrax. A report of three fatal cases. *Am J Pathol* **1960**; 36:457-71.
97. Kohout E, Sehat A, Ashraf M. Anthrax: A continuous problem in Southwest Iran. *Am J Med Sci* **1964**; 247:565-75.
98. Suić M, Knezević J, Tomić M. [A case of pulmonary anthrax]. *Lijecnicki Vjesnik* **1966**; 88(12):1449-55.
99. Tantajumroon T, Panas-Ampol K. Intestinal anthrax: Report of two cases. *Journal of the Medical Association of Thailand* **1968**; 51:477-80.
100. Dutz W, Saidi F, Kohout E. Gastric anthrax with massive ascites. *Gut* **1970**; 11(4):352-54.
101. Brachman PS. Anthrax. *Ann N Y Acad Sci* **1970**; 174(2):577-82.
102. Samson E. Anthrax in the Mount Darwin area. *Central African Journal of Medicine* **1970**; 16(1):6-7.
103. Tahernia AC, Hashemi G. Survival in anthrax meningitis. *Pediatrics* **1972**; 50(2):329-33.
104. Tengio FU. Anthrax meningitis. Report of two cases. *East African Medical Journal* **1973**; 50(7):337-9.
105. Beer K. [Anthrax meningitis]. *Pathologia Et Microbiologia* **1973**; 39(1):12-3.
106. McSwiggan DA, Hussain KK, Taylor IO. A fatal case of cutaneous anthrax. *Journal of Hygiene* **1974**; 73(1):151-6.
107. Vessal K, Yeganehdoust J, Dutz W, Kohout E. Radiological changes in inhalation anthrax. A report of radiological and pathological correlation in two cases. *Clin Radiol* **1975**; 26(4):471-4.
108. Rangel RA, González DA. Bacillus anthracis meningitis. *Neurology* **1975**; 25(6):525-30.
109. Pandey R. Anthrax of the palate. *Indian Journal of Otolaryngology* **1997**; 29(3):140.
110. Nalin DR, Sultana B, Sahunja R, et al. Survival of a patient with intestinal anthrax. *Am J Med* **1977**; 62(1):130-2.
111. Suffin SC, Carnes WH, Kaufmann AF. Inhalation anthrax in a home craftsman. *Hum Pathol* **1978**; 9(5):594-7.
112. Brachman PS. Inhalation anthrax. *Ann N Y Acad Sci* **1980**; 353:83-93.
113. Manios S, Kavaliotis I. Anthrax in children: a long forgotten, potentially fatal infection. *Scandinavian Journal of Infectious Diseases* **1979**; 11(3):203-6.
114. Jena GP. Intestinal anthrax in man: a case report. *Central African Journal of Medicine* **1980**; 26(12):253-4.
115. Levy LM, Baker N, Meyer MP, Crosland P, Hampton J. Anthrax meningitis in Zimbabwe. *Central African Journal of Medicine* **1981**; 27(6):101-4.
116. Chandramukhi A, Shankar P, Rao TV, Sundararajan S, Swamy HS. Acute leptomeningitis due to Bacillus anthracis. A case report. *Tropical and Geographical Medicine* **1983**; 35(1):79-82.
117. Wylock P, Jaeken R, Deraemaeker R. Anthrax of the hand: case report. *J Hand Surg Am* **1983**; 8(5):576-8.
118. Doğanay M, Almaç A, Hanağasi R. Primary throat anthrax. A report of six cases. *Scandinavian Journal of Infectious Diseases* **1986**; 18(5):415-9.
119. Kutluk MT, Seçmeer G, Kanra G, Celiker A, Aksöyek H. Cutaneous anthrax. *Cutis* **1987**; 40(2):117-8.
120. Khanna N, Gokul BN, Ravikumar R, et al. Successfully treated primary anthrax meningitis. *Indian J Pathol Microbiol* **1989**; 32(4):315-7.
121. Lalitha M, Anandi V, Walter N, et al. Unusual forms of anthrax - A clinical problem. *Salisbury Medical Bulletin* **1990**; 68:38-40.
122. Kunanusont C, Limpakarnjanarat K, Foy HM. Outbreak of anthrax in Thailand. *Annals of Tropical Medicine and Parasitology* **1990**; 84(5):507-12.
123. Winter H, Pfisterer RM. [Inhalation anthrax in a textile worker: non-fatal course]. *Schweizerische Medizinische Wochenschrift* **1991**; 121(22):832-5.
124. Pfisterer RM. [An anthrax epidemic in Switzerland. Clinical, diagnostic and epidemiological aspects of a mostly forgotten disease]. *Schweizerische Medizinische Wochenschrift* **1991**; 121(22):813-25.
125. Bharathmoorthy, Chakravarthy I, Swaminathan RP, et al. Haemorrhagic meningitis due to Bacillus anthracis. *J Assoc Physicians India* **1992**; 40(2):134-5.
126. Amraoui A, Tabbara KF, Zaghloul K. Anthrax of the eyelids. *Br J Ophthalmol* **1992**; 76(12):753-4.
127. de Lalla F, Ezzell JW, Pellizzer G, et al. Familial outbreak of agricultural anthrax in an area of northern Italy. *Eur J Clin Microbiol Infect Dis* **1992**; 11(9):839-42.

128. Tabatabaie P, Syadati A. *Bacillus anthracis* as a cause of bacterial meningitis. *Pediatr Infect Dis J* **1993**; 12(12):1035-7.
129. Abramova FA, Grinberg LM, Yampolskaya OV, Walker DH. Pathology of inhalational anthrax in 42 cases from the Sverdlovsk outbreak of 1979. *Proc Natl Acad Sci U S A* **1993**; 90(6):2291-4.
130. Paulet R, Caussin C, Coudray JM, Selcer D, de Rohan Chabot P. [Visceral form of human anthrax imported from Africa]. *Presse Med* **1994**; 23(10):477-8.
131. Doganay M, Aygen B, Inan M, Kandemir O, Turnbull P. Temporal artery inflammation as a complication of anthrax. *J Infect* **1994**; 28(3):311-4.
132. George S, Mathai D, Balraj V, Lalitha MK, John TJ. An outbreak of anthrax meningoencephalitis. *Trans R Soc Trop Med Hyg* **1994**; 88(2):206-7.
133. Skolubovich GV, Ruban GE. [An outbreak of anthrax in Amur Province in 1954 (from experience in the diagnosis and control of anthrax)]. *Zhurnal Mikrobiologii, Epidemiologii I Immunobiologii* **1995**; (4):102-5.
134. Berthier M, Fauchere JL, Perrin J, Grignon B, Oriot D. Fulminant meningitis due to *Bacillus anthracis* in 11-year-old girl during Ramadan. *Lancet* **1996**; 347(9004):828.
135. Celebi S, Celebi H, Celiker UO, Kandemir B, Alagöz G, Esmerligil S. Anthrax as the cause of preseptal cellulitis. *Acta Ophthalmologica Scandinavica* **1997**; 75(4):462-3.
136. Kwong KL, Que TL, Wong SN, So KT. Fatal meningoencephalitis due to *Bacillus anthracis*. *J Paediatr Child Health* **1997**; 33(6):539-41.
137. Yeung STK. Human anthrax in Hong Kong in the past two decades. *Public Health & Epidemiology Bulletin (Hong Kong Department of Health)* **2002**; 11:9-11.
138. Lester R, Beaton S, Carnie J, Barbis D, Rouch G. A case of human anthrax in Victoria. *Commun Dis Intell* **1997**; 21(4):47-8.
139. Domínguez E, Bustos C, García M, Recio S. Anthrax meningoencephalitis: radiologic findings. *AJR Am J Roentgenol* **1997**; 169(1):317.
140. Mallon E, McKee PH. Extraordinary case report: cutaneous anthrax. *Am J Dermatopathol* **1997**; 19(1):79-82.
141. Sarada D, Valentina G, Lalitha M. Cutaneous anthrax involving the eyelids. *Indian J Med Microbiol* **1999**; 17(2):92-5.
142. Felek S, Akbulut A, Kalkan A. A case of anthrax sepsis: non-fatal course. *J Infect* **1999**; 38(3):201-2.
143. Garcia AG, Jimenez RR. Images in clinical medicine. *Bacillus anthracis* meningitis. *N Engl J Med* **1999**; 341(11):814.
144. Ozkaya E, Kirimi E, Berktaş M, Odabas D. *Bacillus anthracis* sepsis in a newborn. *Pediatr Infect Dis J* **2000**; 19(5):487-8.
145. Ringertz SH, Høiby EA, Jensenius M, et al. Injectional anthrax in a heroin skin-popper. *Lancet* **2000**; 356(9241):1574-5.
146. Karthikeyan K, Bhattacharya S, Thappa DM, Kanungo R. Anthrax in an infant. *Indian Pediatr* **2001**; 38(7):777-9.
147. Vijaikumar M, Thappa DM, Jeevankumar B. Cutaneous anthrax: Still a reality in India. *Pediatr Dermatol* **2001**; 18(5):456-7.
148. Celebi S, Aykan U, Alagoz G, Esmerligil S. Palpebral anthrax. *Eur J Ophthalmol* **2001**; 11(2):171-4.
149. Khajehdehi P. Toxemic shock, hematuria, hypokalemia, and hypoproteinemia in a case of cutaneous anthrax. *The Mount Sinai Journal of Medicine, New York* **2001**; 68(3):213-5.
150. Centers for Disease Control and Prevention. Update: Investigation of bioterrorism-related anthrax and interim guidelines for exposure management and antimicrobial therapy, October 2001. *MMWR Morb Mortal Wkly Rep* **2001**; 50(42): 909-19.
151. Wright ME, Friedlander AM. Anthrax. In: Rothe, C. *Clinical Cases in Tropical Medicine*. Philadelphia, PA: Elsevier; **2014**
152. Jernigan JA, Stephens DS, Ashford DA, et al. Bioterrorism-related inhalational anthrax: the first 10 cases reported in the United States. *Emerg Infect Dis* **2001**; 7(6):933-44.
153. Centers for Disease Control and Prevention (CDC). Update: Investigation of bioterrorism-related anthrax and interim guidelines for clinical evaluation of persons with possible anthrax. *MMWR Morb Mortal Wkly Rep* **2001**; 50(43):941-8.
154. Guarner J, Jernigan JA, Shieh W-J, et al. Pathology and pathogenesis of bioterrorism-related inhalational anthrax. *Am J Pathol* **2003**; 163(2):701-9.
155. Borio L, Frank D, Mani V, et al. Death due to bioterrorism-related inhalational anthrax: report of 2 patients. *JAMA* **2001**; 286(20):2554-9.
156. Quintiliani R. Fatal case of inhalational anthrax mimicking intra-abdominal sepsis. *Connecticut Medicine* **2002**; 66(5):261-7.
157. Kim HJ, Jun WB, Lee SH, Rho MH. CT and MR findings of anthrax meningoencephalitis: report of two cases and review of the literature. *AJNR Am J Neuroradiol* **2001**; 22(7):1303-5.

158. Soysal HG, Kiratli H, Recep OF. Anthrax as the cause of preseptal cellulitis and cicatricial ectropion. *Acta Ophthalmologica Scandinavica* **2001**; 79(2): 208-9.
159. Mayer TA, Bersoff-Matcha S, Murphy C, et al. Clinical presentation of inhalational anthrax following bioterrorism exposure: Report of 2 surviving patients. *JAMA* **2001**; 286(20):2549-53.
160. Mina B, Dym JP, Kuepper F, et al. Fatal inhalational anthrax with ... source of exposure in a 61-year-old woman in New York City. *JAMA* **2002**; 287(7):858-62.
161. Bush LM, Abrams BH, Beall A, Johnson CC. Index case of fatal inhalational anthrax due to bioterrorism in the United States. *N Engl J Med* **2001**; 345(22):1607-10.
162. Centers for Disease Control and Prevention (CDC). Update: investigation of bioterrorism-related inhalational anthrax--Connecticut, 2001. *MMWR Morb Mortal Wkly Rep* **2001**; 50(47):1049-51.
163. Barakat LA, Quentzel HL, Jernigan JA, et al. Fatal inhalational anthrax in a 94-year-old Connecticut woman. *JAMA* **2002**; 287(7):863-8.
164. Freedman A, Afonja O, Chang MW, et al. Cutaneous anthrax associated with microangiopathic hemolytic anemia and coagulopathy in a 7-month-old infant. *JAMA* **2002**; 287(7):869-74.
165. Sujatha S, Parija SC, Bhattacharya S, et al. Anthrax peritonitis. *Trop Doct* **2002**; 32(4):247-8.
166. Kanafani ZA, Ghossain A, Sharara AI, Hatem JM, Kanj SS. Endemic gastrointestinal anthrax in 1960s Lebanon: Clinical manifestations and surgical findings. *Emerg Infect Dis* **2003**; 9(5):520-5.
167. Beheshti S, Rezaian G-R, Afifi S, Rezaian S. Gastrointestinal anthrax: Review of nine patients. *Arch Iranian Med* **2003**; 6(4):251-4.
168. Kadanali A, Tasyaran MA, Kadanali S. Anthrax during pregnancy: case reports and review. *Clin Infect Dis* **2003**; 36(10): 1343-6.
169. Faghihi G, Siadat AH. Cutaneous anthrax associated with facial palsy: case report and literature review. *J Dermatolog Treat* **2003**; 14(1):51-3.
170. Velayudhan MN, Nalini P, Kanungo R, Shashikala null, Cherian TA, Srinivasan S. Inhalational anthrax with acute respiratory distress syndrome. *Annals of Tropical Paediatrics* **2005**; 25(1):49-52.
171. Gürcan Ş, Akata F, Kuloğlu F, Erdoğan S, Tuğrul M. Meningitis Due to Bacillus Anthracis. *Yonsei Med J* **2005**; 46(1):159-60.
172. Yakupogullari Y, Kabakus N, Durukan M, Kizirgil A, Bulut Y, Yilmaz M. Anthrax meningoencephalitis secondary to oral infection. *Pediatr Infect Dis J* **2006**; 25(6):572-3.
173. Babamahmoodi F, Aghabarari F, Arjmand A, Ashrafi GH. Three rare cases of anthrax arising from the same source. *J Infect* **2006**; 53(4):e175-9.
174. Yildirim H, Kabakus N, Koc M, Murat A, Inceköy Girgin F. Meningoencephalitis due to anthrax: CT and MR findings. *Pediatr Radiol* 2006; 36(11):1190-3.
175. Yetkin MA, Erdinc FS, Bulut C, Tulek N. Cutaneous anthrax as an occupational disease in Central Anatolia, Turkey. *Saudi Med J* **2006**; 27(5):737-9.
176. Ghossain A. Anthrax of the Cecum. *N Engl J Med* **2006**; 355(9):940.
177. Van den Enden E, Van Gompel A, Van Esbroeck M. Cutaneous Anthrax, Belgian Traveler. *Emerg Infect Dis* **2006**; 12(3):523-5.
178. Centers for Disease Control and Prevention (CDC). Inhalation anthrax associated with dried animal hides--Pennsylvania and New York City, 2006. *MMWR Morb Mortal Wkly Rep* **2006**; 55(10):280-2.
179. Walsh JJ, Pesik N, Quinn CP, et al. A case of naturally acquired inhalation anthrax: clinical care and analyses of anti-protective antigen immunoglobulin G and lethal factor. *Clin Infect Dis* **2007**; 44(7):968-71.
180. Peck RN, Fitzgerald DW. Cutaneous anthrax in the Artibonite Valley of Haiti: 1992-2002. *Am J Trop Med Hyg* **2007**; 77(5):806-11.
181. Kumandas S, Kose M, Gumus H, Per H, Saygin B. Cutaneous anthrax involving the genital area. *Annals of Tropical Paediatrics* **2007**; 27(4): 307-9.
182. Rao GRR, Padmaja J, Lalitha MK, et al. Cutaneous anthrax in a remote tribal area--Araku Valley, Visakhapatnam district, Andhra Pradesh, southern India. *Int J Dermatol* **2007**; 46(1):55-8.
183. Karpouzis A, Panopoulou M, Bazzano G, et al. Extensive cutaneous anthrax in an immunocompetent patient. *Eur J Dermatol* **2007**; 17(5):443-5.
184. Bindu M, Vengamma B, Kumar G. Anthrax meningoencephalitis successfully treated. *Eur J Neurol* **2007**; 14(8):e18.

185. Ozcan H, Kayabas U, Bayindir Y, Bayraktar MR, Ay S. Evaluation of 23 cutaneous anthrax patients in eastern Anatolia, Turkey: diagnosis and risk factors. *Int J Dermatol* **2008**; 47(10):1033-7.
186. Anaraki S, Addiman S, Nixon G, et al. Investigations and control measures following a case of inhalation anthrax in East London in a drum maker and drummer, October 2008. *Euro Surveill* **2008**; 13(51):19076.
187. Cinquetti G, Banal F, Dupuy A-L, et al. Three related cases of cutaneous anthrax in France: clinical and laboratory aspects. *Medicine (Baltimore)* **2009**; 88(6):371-5.
188. Metan G, Uysal B, Coşkun R, Perçin D, Doğanay M. [Anthrax meningoencephalitis: a case report and review of Turkish literature]. *Mikrobiyol Bul* **2009**; 43(4): 671-676.
189. Meric M, Willke A, Muezzinoglu B, Karadenizli A, Hosten T. A case of pneumonia caused by *Bacillus anthracis* secondary to gastrointestinal anthrax. *Int J Infect Dis* **2009**; 13(6):e456-8.
190. Akbayram S, Doğan M, Akgün C, et al. Clinical findings in children with cutaneous anthrax in eastern Turkey. *Pediatr Dermatol* **2010**; 27(6):600-6.
191. Esmer O, Karadag R, Bilgili SG, Gultepe B, Bayramlar H, Karadag AS. Three eyelid localized cutaneous anthrax cases. *Cutan Ocul Toxicol* **2014**; 33(4):345-7.
192. Hatami H, Ramazankhani A, Mansoori F. Two cases of gastrointestinal anthrax with an unusual presentation from Kermanshah (western Iran). *Arch Iran Med* **2010**; 13(2):156-9.
193. Doganay M, Metan G, Alp E. A review of cutaneous anthrax and its outcome. *J Infect Public Health* **2010**; 3(3):98-105.
194. Beaumont G. Anthrax in a Scottish intravenous drug user. *J Forensic Leg Med* **2010**; 17(8):443-5.
195. Klempner MS, Talbot EA, Lee SI, Zaki S, Ferraro MJ. Case records of the Massachusetts General Hospital. Case 25-2010. A 24-year-old woman with abdominal pain and shock. *N Engl J Med* **2010**; 363(8):766-77.
196. Doğanay M, Metan G. A rare clinical presentation and outcome of cutaneous anthrax: toxemic shock: Case report. *Turkiye Klinikleri Journal of Medical Sciences* **2012**; 32(3):841-5.
197. Khoddami M, Shirvani F, Esmaeili J, Beladimogaddam N. Two rare presentations of fatal anthrax: meningeal and intestinal. *Arch Iran Med* **2010**; 13(5):432-5.
198. David S, Peter J, Raju R, Padmaja P, Mohanraj P. Oculocutaneous anthrax: detection and treatment. *Clinical Ophthalmology* **2010**; 4:713-6.
199. Radun D, Bernard H, Altmann M, et al. Preliminary case report of fatal anthrax in an injecting drug user in North-Rhine-Westphalia, Germany, December 2009. *Euro Surveill* **2010**; 15(2):19464.
200. Ozdemir H, Demirdag K, Ozturk T, Kocakoc E. Anthrax of the gastrointestinal tract and oropharynx: CT findings. *Emerg Radiol* **2010**; 17(2):161-4.
201. Tekin R, Celen MK, Bosnak V, Caca I, Ayaz C. Anthrax On Lower Eyelid: A Case Report. *Turkish Bulletin of Hygiene and Experimental Biology* **2011**; 68(2).
202. Johns N, Cooper D, Terrace J. An Unusual Case of Peritonitis in an Intravenous Drug User. *Gastroenterology* **2011**; 141(2):436.
203. Booth M, Donaldson L, Cui X, et al. Confirmed *Bacillus anthracis* Infection among Persons Who Inject Drugs, Scotland, 2009–2010. *Emerg Infect Dis* **2014**; 20(9):1452-63.
204. Cui X, Nolen LD, Sun J, et al. Analysis of Anthrax Immune Globulin Intravenous with Antimicrobial Treatment in Injection Drug Users, Scotland, 2009–2010. *Emerg Infect Dis* **2017**; 23(1):56-65.
205. Parcell BJ, Wilmschurst AD, France AJ, Motta L, Brooks T, Olver WJ. Injection anthrax causing compartment syndrome and necrotising fasciitis. *J Clin Pathol* **2011**; 64(1):95-6.
206. Tekin R, Yesilova Y, Bosnak V, Celen M, Ayaz C. A 32-Year-Old Male with an Ulcer with Necrotic Crusts on the Right Arm. *Mamara Medical Journal* **2011**; 24:139-140.
207. Powell AG, Crozier JE, Hodgson H, Galloway DJ. A case of septicaemic anthrax in an intravenous drug user. *BMC Infect Dis* **2011**; 11:21.
208. Knox D, Murray G, Millar M, et al. Subcutaneous anthrax in three intravenous drug users: a new clinical diagnosis. *The Journal of Bone and Joint Surgery. British Volume Br* **2011**; 93(3):414-7.

209. Ponce M, Mendoza A, Seas C. A 45-Year-Old farmer with an ulcerative rash, shock, and hemorrhagic meningitis. *Am J Trop Med Hyg* **2011**; 85(5):792.
210. Jallali N, Hettiaratchy S, Gordon AC, Jain A. The surgical management of injectional anthrax. *J Plast Reconstr Aesthet Surg* **2011**; 64(2):276-7.
211. Sprenkle M. Inhalation Anthrax Case Presentation. PowerPoint presented at the: Expert Panel Meeting on Anthrax Clinical Management; 2011; Centers for Disease Control and Prevention.
212. Ari Ş, Sakin F, Şahin A, Çaçı İ. Cutaneous Palpebral Anthrax: Case Report. *Turkiye Klinikleri J Med Sci* **2012**; 32(6):1714-7.
213. Akbulut A, Akbulut H, Özgüler M, İnci N, Yalçın Ş. Gastrointestinal Anthrax: A Case and Review of Literature. *Advances in Infectious Diseases* **2012**; 2(3):720-6.
214. Stefos A, Gatselis N, Goudelas A, et al. Cutaneous infection caused by *Bacillus anthracis* in Larissa, Thessaly, Central Greece, July 2012. *Euro Surveill* **2012**; 17(32):20245.
215. Keenan J, Sprenkle M, Sandoval Y. Inhalational anthrax. Poster presented at the: American Thoracic Society 2012 International Conference; 2012; Moscone Center.
216. Maddah G, Abdollahi A, Katebi M. Gastrointestinal anthrax: Clinical experience in 5 cases. *Caspian Journal of Internal Medicine* **2013**; 4(2):672-6.
217. Gelaw Y, Asaminew T. Periocular cutaneous anthrax in Jimma Zone, Southwest Ethiopia: A case series. *BMC Res Notes* **2013**; 6:313.
218. Meghji S, Judd O, Carr E. Fatal cutaneous anthrax in a heroin user. *J Laryngol Otol* **2013**; 127(4): 423-5.
219. Russell L, Pedersen M, Jensen AV, Sjøes LM, Hansen A-BE. Two anthrax cases with soft tissue infection, severe oedema and sepsis in Danish heroin users. *BMC Infect Dis* **2013**; 13:408.
220. Abbara A, Brooks T, Taylor GP, et al. Lessons for Control of Heroin-Associated Anthrax in Europe from 2009–2010 Outbreak Case Studies, London, UK. *Emerg Infect Dis* **2014**; 20(7):1115-22.
221. Veitch J, Kansara A, Bailey D, Kustos I. Severe systemic *Bacillus anthracis* infection in an intravenous drug user. *BMJ Case Rep* **2014**; 2014:1-4.
222. Dewar S, Weir-McCall JR, Batchelor L, Cole S, Parcell BJ. *Bacillus anthracis* meningitis during an outbreak of injectional anthrax, Scotland, UK. *Clin Microbiol Infect* **2015**; 21(8):e49-50.
223. Ekinci M, Çağatay HH, Hüseyinoğlu N, Ceylan E, Gökçe G. Optic Atrophy Secondary to Preseptal Cutaneous Anthrax: Case Report. *Neuro-Ophthalmology* **2014**; 38(4):220-3.
224. Afshar P, Hedayati MT, Aslani N, et al. First Autochthonous Coinfected Anthrax in an Immunocompetent Patient. *Case Reports in Medicine* 2015; 2015:1-5.
225. Inverarity DJ, Forrester VM, Cumming JGR, et al. Injectional anthrax at a Scottish district general hospital. *Epidemiol Infect* **2015**; 143(6):1311-21.
226. Parlak E, Parlak M, Doğanay M. A rare cause of blindness: Cutaneous anthrax. *Acta Medica Mediterranea* **2015**; 31:1299-302.
227. Sari T, Koruk ST. Cutaneous anthrax in an unusual location: case report. *Le Infezioni in Medicina* **2015**; 23(4):370-73.
228. European Food Safety Authority. Technical report on a fatal human case of *Bacillus anthracis* infection and bovine meat contamination in Bulgaria. First update, 7 August 2015. *EFSA Supporting Publications* **2015**; 12(8):863e.
229. Chen H, Bao W, Wang Y, Zhang K, Wang F. Clinical and epidemiological investigation of a fatal anthrax case in China. *J Infect Dev Ctries* **2015**; 9(2):214-7.
230. Parlak E, Parlak M, Atli SB. Unusual cause of fatal anthrax meningitis. *Cutan Ocul Toxicol* **2015**; 34(1):77-9.
231. Patassi AA, Saka B, Landoh DE, Agbenoko K, Tamekloe T, Salmon-Ceron D. Detection and management of the first human anthrax outbreak in Togo. *Trop Doct* **2016**; 46(3):129-34.
232. Gaitanis G, Lolis CJ, Tsartsarakis A, et al. An Aggregate of Four Anthrax Cases during the Dry Summer of 2011 in Epirus, Greece. *Dermatology* **2016**; 232(1):112-6.
233. Parlak E, Erturk A, Erol S, Parlak M, Ozkurt Z. Cutaneous Anthrax on Eyelid in a Pregnant Woman. *Eurasian Journal of Medicine* **2016**; 48(2):142-4.
234. Orlos Z, Rakoczi E, Misak O, et al. Outbreak of anthrax in adults and adolescents: a review of nine cases in a regional teaching hospital in East Hungary. *Clin Microbiol Infect* **2017**; 23(1):52-4.
235. Azarkar Z, Bidaki MZ. A case report of inhalation anthrax acquired naturally. *BMC Res Notes* **2016**; 9:141.

236. Öztaş D, Hasanoğlu İ, Buzgan T, Taşyaran MA, Tufan ZK. Eid al-Adha Associated Infections: Three Case Reports. *Van Veterinary Journal* **2017**; 28(3):165-8.
237. Kılınç S, Keskinbıçkılı MV, Şengül M, Nergiz S, Örtücü A, Bulut O. A serious case of anthrax associated with compartment syndrome. *Cutan Ocul Toxicol* **2017**; 36(4):404-6.
238. Manias V, Nagel A, Mollerach A, et al. Ántrax fatal: primer caso humano documentado en Argentina de meningitis y bacteriemia. *Revista de la Sociedad Venezolana de Microbiología* **2017**; 37(2):66-70.
239. Yuan H-L, Zheng Y-Y, Zhang W, Xie H. Two cases of human cutaneous anthrax with massive tissue damage, severe edema, and slight injury to the liver. *Int J Dermatol* **2018**; 57(3):358-61.
240. Ozer V, Gunaydin M, Pasli S, Aksoy F, Gunduz A. Gastrointestinal and cutaneous anthrax: Case series. *Turkish Journal of Emergency Medicine* **2019**; 19(2):76-8.
241. Aydın ZGG, Çiftçibaşı2 AG, Özkaya E, Aksoy F, Yılmaz MA, Aktaş D. Anthrax: Management of pediatric cases after exposure. *J Pediatr Inf Dis* **2018**; 12(1):e20-5.
242. Garg N, Panmei K. First reported case of naturally acquired fatal anthrax from Northeast India. *Journal of Family Medicine and Primary Care* **2018**; 7(3):632.

**Supplementary Table 2a. Survival for Adults Reported to Be Hospitalized for Anthrax by Meningitis Status, Route of Infection, Systemic Criteria, and Treatment During First Two Days of Hospitalization, <sup>a</sup> 1880–2018**

| Treatment                                | Without Meningitis               |                                 |                       |                        |                                           |                                       | With Meningitis |
|------------------------------------------|----------------------------------|---------------------------------|-----------------------|------------------------|-------------------------------------------|---------------------------------------|-----------------|
|                                          | Localized Cutaneous<br>(N = 131) | Systemic Cutaneous<br>(N = 115) | Ingestion<br>(N = 16) | Inhalation<br>(N = 32) | Non-Systemic <sup>b, d</sup><br>(N = 143) | Systemic <sup>b, d</sup><br>(N = 199) | (N = 62)        |
| None <sup>e</sup>                        | 13/21 (62%)                      | 9/17 (53%)                      | 2/3 (67%)             | 1/13 (8%)              | 13/26 (50%)                               | 14/31 (45%)                           | 0/23 (0%)       |
| 1 Antimicrobial (Abx) Class <sup>f</sup> | 61/62 (98%)                      | 44/45 (98%)                     | 5/8 (63%)             | 1/6 (17%)              | 62/64 (97%)                               | 55/65 (85%)                           | 3/14 (21%)      |
| 2 Abx Classes                            | 7/7 (100%)                       | 8/8 (100%)                      | 0/4 (0%)              | 4/4 (100%)             | 7/7 (100%)                                | 14/19 (74%)                           | 0/10 (0%)       |
| ≥3 Abx Classes                           | 8/8 (100%)                       | 1/1 (100%)                      | 0/1 (0%)              | 3/6 (50%)              | 13/13 (100%)                              | 17/24 (71%)                           | 3/8 (38%)       |
| Antiserum <sup>g</sup>                   | 22/23 (96%)                      | 33/41 (80%)                     | ... ..                | 1/2 (50%)              | 22/23 (96%)                               | 34/43 (79%)                           | 0/3 (0%)        |
| Antiserum & 1Abx Class                   | 8/8 (100%)                       | ... ..                          | ... ..                | ... ..                 | 8/8 (100%)                                | 0/1 (0%)                              | 1/2 (50%)       |
| Antiserum & ≥2 Abx Classes               | 1/1 (100%)                       | ... ..                          | ... ..                | ... ..                 | 1/1 (100%)                                | 6/8 (75%)                             | 0/1 (0%)        |
| Bactericidal(s)                          | 60/61 (98%)                      | 47/48 (98%)                     | 5/11 (45%)            | 3/8 (38%)              | 61/63 (97%)                               | 59/71 (83%)                           | 4/18 (22%)      |
| Protein Synthesis Inhibitor(s) (PSI)     | 11/11 (100%)                     | 5/5 (100%)                      | 0/1 (0%)              | 1/3 (33%)              | 11/11 (100%)                              | 7/11 (64%)                            | 0/2 (0%)        |
| Bactericidal(s) & PSI(s)                 | 6/6 (100%)                       | 4/4 (100%)                      | 0/1 (0%)              | 4/5 (80%)              | 11/11 (100%)                              | 27/33 (82%)                           | 3/13 (23%)      |

Abbreviations: Abx, antimicrobial; PSI, protein synthesis inhibitor.

<sup>a</sup> Treatments in this table refer to antimicrobials, antitoxin/antiserum, or a combination of both. Each line is the number that survived divided by the total number that received that treatment only (eg, ‘Single Antimicrobial’ means that they received a single antimicrobial and they did not receive antitoxin/antiserum). ‘Bactericidal(s)’ means that they received 1 or more bactericidal but no protein synthesis inhibitor and no antitoxin/antiserum). Sulfa drugs and cephalosporins are not considered anthrax-appropriate antimicrobial treatment and therefore did not contribute to the count of antimicrobials in this table. Patients described by authors Meselson (N=76) and Andrews (N=132) were excluded due to their lack of treatment data (Meselson M et al. Science 1994; 266(5188): 1202-8; Andrews J. Monthly Review of the US Bureau of Labor Statistics 1920; (267): 58-9). Additional exclusions included nine patients that were dead on arrival; 109, who died on their first day of hospitalization; and eight, who lacked survival status. Thirteen patients had at least 1 antimicrobial other than a sulfa or cephalosporin prior to hospitalization and 13 patients had their first treatment after day 2 of hospitalization and were excluded from this table. A few patients had unclear treatment timing and could not be classified.

<sup>b</sup> Systemic refers to our definition published in “Identifying Meningitis During an Anthrax Mass Casualty Incident: Systemic Review of Systemic Anthrax Since 1880” except that we removed the qualification of “death.” [11]

<sup>c</sup> Nonsystemic patients lacking meningitis consisted of the following: 131 cutaneous, 5 inhalation, and 7 injection.

<sup>d</sup> Systemic patients lacking meningitis consisted of the following: 1 nasopharyngeal, 115 cutaneous, 16 ingestion, 27 inhalation, and 40 injection.

<sup>e</sup> ‘None’ refers to no antimicrobials or antitoxin/antiserum given at all prior to or throughout hospitalization. This is the only category that is not restricted to the first 2 days of hospitalization.

<sup>f</sup> Antimicrobials are lumped into classes. Therefore, having 1 antimicrobial refers to 1 class of antimicrobials, 2 antimicrobials refers to having 2 different classes of antimicrobials, etc.

<sup>g</sup> This includes both antiserum and antitoxin.

**Supplementary Table 2b. Survival for Children and Adolescents Reported to Be Hospitalized for Anthrax by Meningitis Status, Route of Infection, Systemic Criteria, and Treatment During First Two Days of Hospitalization,<sup>a</sup> 1940–2018**

| Treatment                                | Without Meningitis              |                                |                       |                       |                                          |                                      | With Meningitis |
|------------------------------------------|---------------------------------|--------------------------------|-----------------------|-----------------------|------------------------------------------|--------------------------------------|-----------------|
|                                          | Localized Cutaneous<br>(N = 80) | Systemic Cutaneous<br>(N = 19) | Ingestion<br>(N = 12) | Inhalation<br>(N = 1) | Non-Systemic <sup>b, c</sup><br>(N = 82) | Systemic <sup>b, d</sup><br>(N = 31) | (N = 13)        |
| None <sup>e</sup>                        | 1/2 (50%)                       | 1/1 (100%)                     | 4/5 (80%)             | --                    | 3/4 (75%)                                | 3/4 (75%)                            | 0/4 (0%)        |
| 1 Antimicrobial (Abx) Class <sup>f</sup> | 72/72 (100%)                    | 15/16 (94%)                    | 4/5 (80%)             | --                    | 72/72 (100%)                             | 19/21 (90%)                          | 1/4 (25%)       |
| 2 Abx Classes                            | 1/1 (100%)                      | 2/2 (100%)                     | 2/2 (100%)            | 0/1 (0%)              | 1/1 (100%)                               | 4/6 (67%)                            | 2/3 (67%)       |
| ≥3 Abx Classes                           | ... ..                          | ... ..                         | ... ..                | ... ..                | ... ..                                   | ... ..                               | ... ..          |
| Antiserum <sup>g</sup>                   | 1/1 (100%)                      | ... ..                         | ... ..                | ... ..                | 1/1 (100%)                               | ... ..                               | ... ..          |
| Antiserum & 1 Abx Class                  | ... ..                          | ... ..                         | ... ..                | ... ..                | ... ..                                   | ... ..                               | ... ..          |
| Antiserum & ≥2 Abx Classes               | ... ..                          | ... ..                         | ... ..                | ... ..                | ... ..                                   | ... ..                               | ... ..          |
| Bactericidal(s)                          | 76/76 (100%)                    | 13/14 (93%)                    | 5/6 (83%)             | --                    | 76/76 (100%)                             | 18/21 (86%)                          | 2/5 (40%)       |
| Protein Synthesis Inhibitor(s) (PSI)     | - -                             | 3/3 (100%)                     | --                    | --                    | --                                       | 3/3 (100%)                           | 1/1 (100%)      |
| Bactericidal(s) & PSI(s)                 | 1/1 (100%)                      | 1/1 (100%)                     | 1/1 (100%)            | 0/1 (0%)              | 1/1 (100%)                               | 2/3 (67%)                            | 1/3 (33%)       |

Abbreviations: Abx, antimicrobial; PSI, protein synthesis inhibitor.

<sup>a</sup> Treatments in this table refer to antimicrobials, antitoxin/antiserum, or a combination of both. Each line is the number that survived divided by the total number that received that treatment only (eg 'Single Antimicrobial' means that they received a single antimicrobial and they did not receive antitoxin/antiserum). 'Bactericidal(s)' means that they received 1 or more bactericidal but no protein synthesis inhibitor and no antitoxin/antiserum). Sulfa drugs and cephalosporins are not considered anthrax-appropriate antimicrobial treatment and therefore did not contribute to the count of antimicrobials in this table. Exclusions included 2 patients that were dead on arrival, 8 who died on their first day of hospitalization, and 1 who lacked survival status. One patient had at least 1 antimicrobial other than a sulfa or cephalosporin prior to hospitalization and 1 patient had their first treatment after day 2 of hospitalization and were excluded from this table. A few patients had unclear treatment timing and could not be classified.

<sup>b</sup> Systemic refers to our definition published in "Identifying Meningitis During an Anthrax Mass Casualty Incident: Systemic Review of Systemic Anthrax Since 1880" except that we removed the qualification of "death" (Katharios-Lanwermyer S et al. Clin Infect Dis 2016; 62(12): 1537-45).

<sup>c</sup> Nonsystemic patients lacking meningitis consisted of the following: 80 cutaneous and 2 ingestion.

<sup>d</sup> Systemic patients lacking meningitis consisted of the following: 1 nasopharyngeal, 19 cutaneous, 10 ingestion, and 1 inhalation.

<sup>e</sup> 'None' refers to no antimicrobials or antitoxin/antiserum given at all prior to or throughout hospitalization. This is the only category that is not restricted to the first 2 days of hospitalization.

<sup>f</sup> Antimicrobials are lumped into classes. Therefore, having 1 antimicrobial refers to 1 class of antimicrobials, 2 antimicrobials refers to having 2 different classes of antimicrobials, etc.

<sup>g</sup> This includes both antiserum and antitoxin.

**Supplementary Table 3a. Survival for Adults Reported to Be Hospitalized for Anthrax by Meningitis Status, Route of Infection, Systemic Criteria, and Antimicrobial Treatment During First Two Days of Hospitalization,<sup>a</sup> 1880–2018**

| Treatment                                                                 | Monotherapy            |            |                       |                 | Combination Therapy    |            |                       |                 |
|---------------------------------------------------------------------------|------------------------|------------|-----------------------|-----------------|------------------------|------------|-----------------------|-----------------|
|                                                                           | Without meningitis     |            |                       | With Meningitis | Without meningitis     |            |                       | With Meningitis |
|                                                                           | Localized<br>Cutaneous | Inhalation | Systemic <sup>b</sup> |                 | Localized<br>Cutaneous | Inhalation | Systemic <sup>b</sup> |                 |
| None <sup>c</sup>                                                         | 13/21 (62%)            | 1/13 (8%)  | 14/31 (45%)           | 0/23 (0%)       | 13/21 (62%)            | 1/13 (8%)  | 14/31 (45%)           | 0/23 (0%)       |
| Any                                                                       | 61/62 (98%)            | 1/6 (17%)  | 55/65 (85%)           | 3/14 (21%)      | 15/15 (100%)           | 7/10 (70%) | 33/45 (73%)           | 3/18 (17%)      |
| Aminoglycosides                                                           | ...                    | ...        | 1/1 (100%)            | -               | 1/1 (100%)             | 2/3 (67%)  | 8/12 (67%)            | 0/6 (0%)        |
| Amphenicols                                                               | 3/3 (100%)             | ...        | 1/1 (100%)            | ...             | ...                    | ...        | ...                   | 0/5 (0%)        |
| Carbapenems                                                               | ...                    | ...        | ...                   | ...             | ...                    | 1/1 (100%) | 2/4 (50%)             | 0/1 (0%)        |
| Fluoroquinolones                                                          | 1/1 (100%)             | ...        | ...                   | ...             | 12/12 (100%)           | 5/8 (63%)  | 24/32 (75%)           | 3/7 (43%)       |
| Glycopeptides                                                             | ...                    | ...        | ...                   | ...             | ...                    | 0/1 (0%)   | 4/7 (57%)             | 0/3 (0%)        |
| Lincosamides                                                              | ...                    | ...        | 2/2 (100%)            | 0/1 (0%)        | 3/3 (100%)             | 2/2 (100%) | 18/21 (86%)           | 2/4 (50%)       |
| Macrolides                                                                | ...                    | 1/2 (50%)  | 1/2 (50%)             | ...             | ...                    | 3/4 (75%)  | 4/5 (80%)             | 1/2 (50%)       |
| Metronidazole                                                             | ...                    | ...        | ...                   | ...             | ...                    | ...        | 2/4 (50%)             | 0/1 (0%)        |
| Oxazolidinone                                                             | ...                    | ...        | ...                   | ...             | ...                    | ...        | ...                   | 0/1 (0%)        |
| Rifamycins                                                                | ...                    | ...        | ...                   | ...             | ...                    | 2/4 (50%)  | 2/4 (50%)             | 2/2 (100%)      |
| Streptogramins                                                            | ...                    | ...        | ...                   | ...             | 7/7 (100%)             | ...        | ...                   | ...             |
| Tetracyclines                                                             | 8/8 (100%)             | 0/1 (0%)   | 3/4 (75%)             | 0/1 (0%)        | 4/4 (100%)             | 1/1 (100%) | 2/2 (100%)            | 0/3 (0%)        |
| Penicillins (all)                                                         | 49/50 (98%)            | 0/3 (0%)   | 47/53 (89%)           | 3/12 (25%)      | 13/13 (100%)           | 3/6 (50%)  | 22/31 (71%)           | 2/15 (13%)      |
| Beta-lactamase resistant or<br>with beta lactamase inhibitor <sup>d</sup> | 4/4 (100%)             | 0/1 (0%)   | 3/4 (75%)             | ...             | 3/3 (100%)             | 1/3 (33%)  | 17/21 (81%)           | 1/2 (50%)       |
| Other <sup>d</sup>                                                        | 45/46 (98%)            | 0/1 (0%)   | 40/44 (91%)           | 3/12 (25%)      | 11/11 (100%)           | 3/7 (43%)  | 24/33 (73%)           | 2/15 (13%)      |

- 
- <sup>a</sup> Each line is the number that survived divided by the total number that received that treatment. Patients described by authors Meselson and Andrews were excluded due to their lack of treatment data (Meselson M et al. *Science* 1994; 266(5188): 1202-8; Andrews J. *Monthly Review of the US Bureau of Labor Statistics* 1920; (267): 58-9). Additional exclusions included patients that were dead on arrival, patients who died on their first day of hospitalization, patients who lacked survival status, and patients who received antitoxin/antiserum during the first 2 days of hospitalization. Sulfa drugs and cephalosporins are not considered anthrax-appropriate antimicrobial treatment and therefore did not contribute to the count of antimicrobials in this table. Patients that had at least 1 antimicrobial other than a sulfa or cephalosporin prior to hospitalization or had their first treatment (antimicrobial or antitoxin/antiserum) after day 2 of hospitalization were excluded from this table. A few cases had unclear treatment timing and could not be classified.
- <sup>b</sup> Systemic refers to our definition published in “Identifying Meningitis During an Anthrax Mass Casualty Incident: Systemic Review of Systemic Anthrax Since 1880” except that we removed the qualification of “death” (Katharios-Lanwermeier S et al. *Clin Infect Dis* 2016; 62(12): 1537-45).
- <sup>c</sup> ‘None’ refers to no antimicrobials or antitoxin/antiserum given at all prior to or throughout hospitalization. This is the only category that is not restricted to the first two days of hospitalization.
- <sup>d</sup> In the last 2 lines of the table, when splitting out beta-lactamase resistant or with beta lactamase inhibitor and other penicillins, monotherapy means that they just had penicillins from that specific category. Combination therapy means they could have also had a penicillin from the other category or any other antimicrobial class. Beta-lactamase resistant or with beta lactamase inhibitor penicillins include ampicillin/sulbactam, tazocin, augmentin, flucloxacillin and other beta lactam penicillin. The ‘Other’ penicillin category includes amoxicillin, ampicillin, penicillin and benzyl/benzathine penicillin.
-

**Supplementary Table 3b. Survival for Adults Reported to Be Hospitalized for Anthrax by Meningitis Status, Route of Infection, Systemic Criteria, and Penicillin Treatment During First Two Days of Hospitalization, <sup>a</sup> 1940–2018**

| Treatment                    | Monotherapy         |            |                       |                 | Combination Therapy |            |                       |                 |
|------------------------------|---------------------|------------|-----------------------|-----------------|---------------------|------------|-----------------------|-----------------|
|                              | Without meningitis  |            |                       | With Meningitis | Without meningitis  |            |                       | With Meningitis |
|                              | Localized Cutaneous | Inhalation | Systemic <sup>b</sup> |                 | Localized Cutaneous | Inhalation | Systemic <sup>b</sup> |                 |
| None <sup>c</sup>            | 3/6 (50%)           | 0/2 (0%)   | 4/9 (44%)             | 0/9 (0%)        | 3/6 (50%)           | 0/2 (0%)   | 4/9 (44%)             | 0/9 (0%)        |
| Penicillins <sup>d</sup>     | 49/50 (98%)         | 0/3 (0%)   | 47/53 (89%)           | 3/12 (25%)      | 13/13 (100%)        | 3/6 (50%)  | 22/31 (71%)           | 2/15 (13%)      |
| Amoxicillin                  | 2/2 (100%)          | ...        | ...                   | 0/1 (0%)        | 6/6 (100%)          | -          | 2/2 (100%)            | 0/1 (0%)        |
| Ampicillin/Sulbactam         | 3/3 (100%)          | ...        | 2/2 (100%)            | ...             | 1/1 (100%)          | 0/1 (0%)   | 4/5 (80%)             | ...             |
| Tazocin                      | ...                 | 0/1 (0%)   | 0/1 (0%)              | ...             | ...                 | 1/1 (100%) | 1/1 (100%)            | ...             |
| Augmentin                    | ...                 | ...        | ...                   | ...             | ...                 | 0/1 (0%)   | 2/3 (67%)             | ...             |
| Ampicillin                   | ...                 | ...        | ...                   | ...             | ...                 | 1/2 (50%)  | 2/3 (67%)             | 0/1 (0%)        |
| Flucloxacillin               | ...                 | ...        | 1/1 (100%)            | ...             | 1/1 (100%)          | ...        | 11/13 (85%)           | 1/2 (50%)       |
| Penicillin                   | 35/35 (100%)        | 0/1 (0%)   | 31/33 (94%)           | 3/10 (30%)      | 2/3 (67%)           | 2/4 (50%)  | 7/12 (58%)            | 1/10 (10%)      |
| Benzathine penicillin        | 5/5 (100%)          | ...        | 7/9 (78%)             | ...             | 5/6 (83%)           | 0/1 (0%)   | 20/23 (87%)           | 1/7 (14%)       |
| Other Beta-lactam penicillin | 1/1 (100%)          | ...        | ...                   | ...             | 1/1 (100%)          | ...        | ...                   | ...             |

<sup>a</sup> Each line is the number that survived divided by the total number that received that treatment. Patients described by author Meselson were excluded due to their lack of treatment data (Meselson M et al. *Science* 1994; 266(5188): 1202-8; Andrews J. *Monthly Review of the US Bureau of Labor Statistics* 1920; (267): 58-9). Additional exclusions included patients that were dead on arrival, patients who died on their first day of hospitalization, patients who lacked survival status, and patients who received antitoxin/antiserum during the first 2 days of hospitalization. Sulfa drugs and cephalosporins are not considered anthrax-appropriate antimicrobial treatment and therefore did not contribute to the count of antimicrobials in this table. Patients that had at least 1 antimicrobial other than a sulfa or cephalosporin prior to hospitalization or had their first treatment (antimicrobial or antitoxin/antiserum) after day 2 of hospitalization were excluded from this table. A few patients had unclear treatment timing and could not be classified.

<sup>b</sup> Systemic refers to our definition published in "Identifying Meningitis During an Anthrax Mass Casualty Incident: Systemic Review of Systemic Anthrax Since 1880" except that we removed the qualification of "death" (Katharios-Lanwermyer S et al. *Clin Infect Dis* 2016; 62(12): 1537-45).

<sup>c</sup> 'None' refers to no antimicrobials or antitoxin/antiserum given at all prior to or throughout hospitalization. This is the only category that is not restricted to the first 2 days of hospitalization.

<sup>d</sup> The overall penicillin row groups all penicillins and counts monotherapy as only receiving penicillin from the penicillin class. Combination therapy would be any penicillin with any other antimicrobial class. The penicillin drugs beneath the class count monotherapy as only having that specific drug. Combination therapy is defined as having any other penicillin drug or any other antimicrobial class.

**Supplementary Table 4. Survival for Children and Adolescents Reported to Be Hospitalized for Systemic Anthrax by Specified Treatment During First Two Days of Hospitalization, 1940–2018<sup>a</sup>**

| Comparison                                                                                                           | Survived     | Died        | Univariate analysis |         |
|----------------------------------------------------------------------------------------------------------------------|--------------|-------------|---------------------|---------|
|                                                                                                                      | n (%), N     | n (%), N    | OR (95% CI)         | p-value |
| Bactericidal(s) Alone vs. No Antimicrobial Treatment                                                                 | 19 (86%), 22 | 6 (50%), 12 | 6.33 (1.20-33.39)   | 0.03    |
| Protein Synthesis Inhibitor(s) Alone vs. No Antimicrobial Treatment                                                  | 4 (57%), 7   | 0 (0%), 6   | 7.31 (1.01-inf)     | 0.10    |
| Bactericidal(s) Alone vs. Protein Synthesis Inhibitor(s) Alone                                                       | 19 (83%), 23 | 6 (100%), 6 | 0.66 (0-4.44)       | 0.75    |
| Bactericidal(s) and Protein Synthesis Inhibitor(s) vs. Bactericidal(s) Alone                                         | 3 (14%), 22  | 3 (33%), 9  | 0.32 (0.05-2.00)    | 0.22    |
| Bactericidal(s) and Protein Synthesis Inhibitor(s) vs. Protein Synthesis Inhibitor(s) Alone                          | 3 (43%), 7   | 3 (100%), 3 | 0.28 (0-2.31)       | 0.33    |
| Bactericidal(s) and Protein Synthesis Inhibitor(s) vs. Bactericidal(s) Alone or Protein Synthesis Inhibitor(s) Alone | 3 (12%), 26  | 3 (33%), 9  | 0.26 (0.04-1.64)    | 0.15    |
| Antimicrobial Combination Therapy vs. Monotherapy                                                                    | 7 (27%), 26  | 4 (44%), 9  | 0.46 (0.10-2.22)    | 0.33    |

Abbreviations: AMS, altered mental status; CI, confidence interval; OR, odds ratio.

<sup>a</sup> Patients are only included in each row if they had the specified treatment being compared. Patients are considered to have the specified treatment if given in the first 2 days of hospitalization. Patients are classified as having no antimicrobial treatment if they did not receive any antimicrobials throughout hospitalization. Patients were excluded from analysis if they were dead on arrival, died on day 1 of hospitalization, or lacked survival status. Additional exclusions included patients that were given anthrax-appropriate antimicrobial treatment prior to hospitalization. Sulfa drugs and cephalosporins are not considered anthrax-appropriate antimicrobial treatment and therefore did not contribute to the count of antimicrobials in this table. Patients that were given antitoxin/antiserum at any time in the course of their treatment were excluded.

**Supplementary Table 5. Survival for Children and Adolescents Reported to Be Hospitalized for Anthrax by Antitoxin/Antiserum Receipt Throughout Hospitalization, 1900–2018<sup>a</sup>**

| Comparison                                     | Survived    | Died       | Univariate analysis |         |
|------------------------------------------------|-------------|------------|---------------------|---------|
|                                                | n (%), N    | n (%), N   | OR (95% CI)         | p-value |
| Antitoxin/Antiserum vs. No Antitoxin/Antiserum | 8 (6%), 126 | 0 (0%), 18 | 1.64 (0.31-inf)     | 0.67    |

Abbreviations: AMS, altered mental status; CI, confidence interval; OR, odds ratio.

<sup>a</sup> Patients are only included in each row if they had the specified treatment being compared. Patients were excluded from analysis if they were dead on arrival, died on day 1 of hospitalization, or lacked survival status. Patients described by the author Andrews were excluded due to their lack of sign, symptom, and treatment data (Andrews J. Monthly Review of the US Bureau of Labor Statistics 1920; (267): 58-9). Patients included in this analysis could have received other treatment, including antimicrobials.

**Supplementary Table 6. Survival for Children and Adolescents Reported to Be Hospitalized for All Types of Anthrax with Various Complications by Steroid Use, 1950–2018<sup>a</sup>**

| Indication for steroid use                                 | Steroids                     |       | No Steroids                     |      |
|------------------------------------------------------------|------------------------------|-------|---------------------------------|------|
|                                                            | Survived/Total with steroids | (%)   | Survived/Total without steroids | (%)  |
| Meningitis, both primary and secondary (N=13) <sup>b</sup> | 1/3                          | (33)  | 3/10                            | (30) |
| Head or neck involvement (N=57) <sup>c</sup>               | 24/25                        | (96)  | 30/32                           | (94) |
| Edema involving > 1 extremity (N=4) <sup>d</sup>           | 3/3                          | (100) | 0/1                             | (0)  |

<sup>a</sup> Excluded patients that were dead on arrival, died on day 1 of hospitalization, or lacked survival status. Excluded patients that were given steroids before hospitalization or after day 2 of hospitalization. Patients that had steroids but no timing information were included

<sup>b</sup> These include the following routes of infection: 8 cutaneous, 1 inhalation, and 4 ingestion. A patient is classified as (1) primary meningitis if they met criteria for meningitis (Katharios-Lanwermeijer S et al. Clin Infect Dis 2016; 62(12): 1537-45) but lacked a discernable route of infection, and (2) secondary meningitis if they met criteria for meningitis and had another route of primary infection

<sup>c</sup> These include the following routes of infection: 54 cutaneous, 2 ingestion, and 1 nasopharyngeal

<sup>d</sup> These include the following routes of infection: 4 cutaneous

**Supplementary Table 7. Survival for Children and Adolescents Reported to Be Hospitalized for Systemic Anthrax Meningitis by Specified Treatment<sup>a</sup>**

| Treatment comparison                                                    | Survived<br>n (%), N | Died<br>n (%), N | OR (95% CI)       | P-Value |
|-------------------------------------------------------------------------|----------------------|------------------|-------------------|---------|
| <b>Antimicrobials<sup>b</sup></b>                                       |                      |                  |                   |         |
| Combination Therapy vs.<br>Monotherapy                                  | 3 (75), 4            | 2 (40), 5        | 4.50 (0.25-80.57) | 0.31    |
| Bactericidal(s) Alone vs.<br>PSI(s) Alone                               | 1 (25), 4            | 3 (60), 5        | Reference         |         |
| Bactericidal(s) Alone vs.<br>PSI(s) Alone                               | 2 (67), 3            | 3 (100), 3       | 1.00 (0-19)       | 1.00    |
| Bactericidal(s) and PSI(s) vs.<br>Bactericidal(s) Alone or PSI(s) Alone | 1 (33), 3            | 0 (0), 3         | Reference         |         |
| Bactericidal(s) and PSI(s) vs.<br>Bactericidal(s) Alone or PSI(s) Alone | 1 (25), 4            | 2 (40), 5        | 0.50 (0.03-8.95)  | 0.64    |
| Bactericidal(s) Alone or PSI(s) Alone                                   | 3 (75), 4            | 3 (60), 5        | Reference         |         |
| <b>Steroids<sup>c</sup></b>                                             |                      |                  |                   |         |
| Yes                                                                     | 1 (25), 4            | 2 (22), 9        | 1.17 (0.07-18.35) | 0.91    |
| No                                                                      | 3 (75), 4            | 7 (78), 9        | Reference         |         |
| <b>Mannitol<sup>d</sup></b>                                             |                      |                  |                   |         |
| Yes                                                                     | 0 (0), 4             | 1 (11), 9        | 2.25 (0-42.75)    | 1.00    |
| No                                                                      | 4 (100), 4           | 8 (89), 9        | Reference         |         |
| <b>Intrathecal/Intraspinal<sup>e</sup></b>                              |                      |                  |                   |         |
| Yes                                                                     | 0 (0), 4             | 0 (0), 9         | ...               | ...     |
| No                                                                      | 4 (100), 4           | 9 (100), 9       | Reference         |         |
| <b>Antitoxin/Antiserum<sup>f</sup></b>                                  |                      |                  |                   |         |
| Yes                                                                     | 0 (0), 4             | 0 (0), 11        | ...               | ...     |
| No                                                                      | 4 (100), 4           | 11 (100), 11     | Reference         |         |

Abbreviations: CI, confidence interval; OR, odds ratio.

<sup>a</sup> Patients were excluded from analysis if they were dead on arrival, died on day 1 of hospitalization, or lacked survival status.

<sup>b</sup> Patients are considered to have the specified antimicrobial treatment if given in the first 2 days of hospitalization. Patients were excluded if they were given anthrax-appropriate antimicrobial treatment prior to hospitalization or if they were given antitoxin/antiserum at any time in the course of their treatment. Sulfa drugs and cephalosporins are not considered anthrax-appropriate antimicrobial treatment and therefore did not contribute to the count of antimicrobials in this table. Only included patients who were described in medical literature from 1940-2018.

<sup>c</sup> Only included patients who were described in medical literature from 1950 through 2018.

<sup>d</sup> Only included patients who were described in medical literature from 1960 through 2018.

<sup>e</sup> Only included patients who were described in medical literature from 1940 through 2018.

<sup>f</sup> Only included patients who were described in medical literature from 1900 through 2018.

**Supplementary Table 8. Hospital Length of Stay for Pediatric Survivors Reported to Be Hospitalized for Anthrax by Meningitis Status, Route of Infection, Systemic Criteria and Treatment During First Two Days of Hospitalization,<sup>a</sup> 1940–2018**

| Treatment                                | Localized Cutaneous <sup>b</sup><br>(N = 80 [79 survivors])<br>Length of Stay |      | Systemic (without meningitis) <sup>b,c</sup><br>(N = 31 [26 survivors])<br>Length of Stay |       | With Meningitis<br>(N = 13 [4 survivors])<br>Length of Stay |       |
|------------------------------------------|-------------------------------------------------------------------------------|------|-------------------------------------------------------------------------------------------|-------|-------------------------------------------------------------|-------|
|                                          | Median (N)                                                                    | IQR  | Median (N)                                                                                | IQR   | Median (N)                                                  | IQR   |
| None <sup>d</sup>                        | 13 (1)                                                                        | ...  | 5 (3)                                                                                     | 5-30  | ... (...)                                                   | ...   |
| 1 Antimicrobial (Abx) Class <sup>e</sup> | 10 (61)                                                                       | 7-10 | 10 (10)                                                                                   | 9-15  | 24 (1)                                                      | ...   |
| 2 Abx Classes                            | ... (...)                                                                     | ...  | 16 (3)                                                                                    | 10-18 | 14 (2)                                                      | 14-14 |
| ≥ 3 Abx Classes                          | ... (...)                                                                     | ...  | ... (...)                                                                                 | ...   | ... (...)                                                   | ...   |
| Antiserum <sup>f</sup>                   | ... (...)                                                                     | ...  | ... (...)                                                                                 | ...   | ... (...)                                                   | ...   |
| Antiserum & 1 Abx Class                  | ... (...)                                                                     | ...  | ... (...)                                                                                 | ...   | ... (...)                                                   | ...   |
| Antiserum & ≥ 2 Abx Classes              | ... (...)                                                                     | ...  | ... (...)                                                                                 | ...   | ... (...)                                                   | ...   |
| Bactericidal(s)                          | 10 (65)                                                                       | 7-10 | 12 (12)                                                                                   | 10-17 | 14 (2)                                                      | 14-14 |
| Protein Synthesis Inhibitor(s) (PSI)     | ... (...)                                                                     | ...  | ... (...)                                                                                 | ...   | 24 (1)                                                      | ...   |
| Bactericidal(s) & PSI(s)                 | ... (...)                                                                     | ...  | 10 (1)                                                                                    | ...   | ... (...)                                                   | ...   |

Abbreviations: Abx, antimicrobials; IQR, interquartile interval; PSI, protein synthesis inhibitor.

- <sup>a</sup> Treatments in this table refer to antimicrobials, antitoxin/antiserum, or a combination of both. Each line is the number that survived divided by the total number that received that treatment only (eg, ‘Single Antimicrobial’ means that they received a single antimicrobial and they did not receive antitoxin/antiserum. ‘Bactericidal(s)’ means that they received 1 or more bactericidal but no protein synthesis inhibitor and no antitoxin/antiserum) and the length of hospital stay for survivors on that treatment only. Sulfa drugs and cephalosporins are not considered anthrax-appropriate antimicrobial treatment and therefore did not contribute to the count of antimicrobials in this table. Exclusions included 2 patients that were dead on arrival, 8 who died on their first day of hospitalization, and 1 who lacked survival status. One patient had at least 1 antimicrobial other than a sulfa or cephalosporin prior to hospitalization and 1 patient had their first treatment after day 2 of hospitalization and were excluded from this table. A few patients had unclear treatment timing and could not be classified.
- <sup>b</sup> Systemic refers to our definition published in “Identifying Meningitis During an Anthrax Mass Casualty Incident: Systemic Review of Systemic Anthrax Since 1880” except that we removed the qualification of “death” (Katharios-Lanwermeier S et al. Clin Infect Dis 2016; 62(12): 1537-45).
- <sup>c</sup> Systemic patients lacking meningitis consisted of the following: 19 cutaneous, 10 ingestion, 1 inhalation, and 1 nasopharyngeal
- <sup>d</sup> ‘None’ refers to no antimicrobials or antitoxin/antiserum given at all prior to or throughout hospitalization. This is the only category that is not restricted to the first 2 days of hospitalization.
- <sup>e</sup> Antimicrobials are lumped into classes. Therefore, having 1 antimicrobial refers to 1 class of antimicrobials, 2 antimicrobials refers to having 2 different classes of antimicrobials, etc.
- <sup>f</sup> This includes both antiserum and antitoxin.

**Supplementary Table 9. Postexposure Prophylaxis in People Exposed to “Anthrax-Affected Animals” in Russia Before 1965<sup>a</sup>**

| Treatment                                                             | Well | Ill | Total | OR        | CI        |
|-----------------------------------------------------------------------|------|-----|-------|-----------|-----------|
| Penicillin 300, 000 U Q12 x 3d                                        | 143  | 2   | 145   | 14.8      | 3.6-61.3  |
| Pencillin 300, 000 U x 1 dose plus Benzacillin 1, 500, 000 U x 1 dose | 44   | 0   | 44    | 18.5      | 1.1-304.6 |
| Chlortetracycline 1g x 3d                                             | 95   | 3   | 98    | 6.5       | 2.0-21.4  |
| No treatment                                                          | 281  | 58  | 339   | reference |           |

Abbreviations: CI, confidence interval; d, day; g, gram; OR, odds ratio; Q, every.

<sup>a</sup> Data from Kebedzhiev G. Antibiotiki 1970; 15(1): 89-93.

**Supplementary Table 10. Postexposure Prophylaxis In People Who Ingested Meat From “Anthrax-Affected Animals” In Russia, 1965–1967<sup>a</sup>**

| Treatment                                                             | Well | Ill | Total | OR        | CI           |
|-----------------------------------------------------------------------|------|-----|-------|-----------|--------------|
| Penicillin 300, 000 U Q12 x 3d                                        | 362  | 0   | 362   | 150.7     | 9.3-2, 448.2 |
| Pencillin 300, 000 U x 1 dose plus Benzacillin 1, 500, 000 U x 1 dose | 24   | 0   | 24    | 10.2      | 0.6-169.8    |
| Chlortetracycline 1g x 3d                                             | 21   | 0   | 21    | 8.9       | 0.5-149.6    |
| No treatment (comparison group for other [pre-1965] arms)             | 281  | 58  | 339   | reference |              |

Abbreviations: CI, confidence interval; d, day; g, gram; OR, odds ratio; Q, every.

<sup>a</sup> Data from Kebedzhiev G. Antibiotiki 1970; 15(1): 89-93.
